# Supplementary material for: Expanding the library of sumanene molecular receptors for caesium-selective potentiometric sensors
Source: Royal Society of Chemistry journal article supplement (doi:10.1039/d3dt03885h), 2024-01-01
Supplement: d3dt03885h1.pdf [file d3dt03885h1.pdf]

## **ELECTRONIC SUPPORTING INFORMATION (ESI) FOR**

### **Expanding the library of sumanene molecular receptors for caesium-selective potentiometric sensors**

Joachim Ażgin<sup>a</sup>, Małgorzata Wesoły<sup>a</sup>, Krzysztof Durka<sup>a</sup>, Hidehiro Sakurai<sup>b,c</sup>, Wojciech Wróblewski<sup>a</sup>, Artur Kasprzak<sup>a,\*</sup>

<sup>a</sup> Faculty of Chemistry, Warsaw University of Technology, Noakowskiego Str. 3, 00-664  
Warsaw, Poland

\* Corresponding author e-mail: artur.kasprzak@pw.edu.pl (A.K.)

<sup>b</sup> Division of Applied Chemistry, Graduate School of Engineering, Osaka University, 2-1  
Yamadaoka, Suita, 565-0871 Osaka, Japan

<sup>c</sup> Innovative Catalysis Science Division, Institute for Open and Transdisciplinary Research  
Initiatives (ICS-OTRI), Osaka University, Suita, Osaka 565-0871, Japan

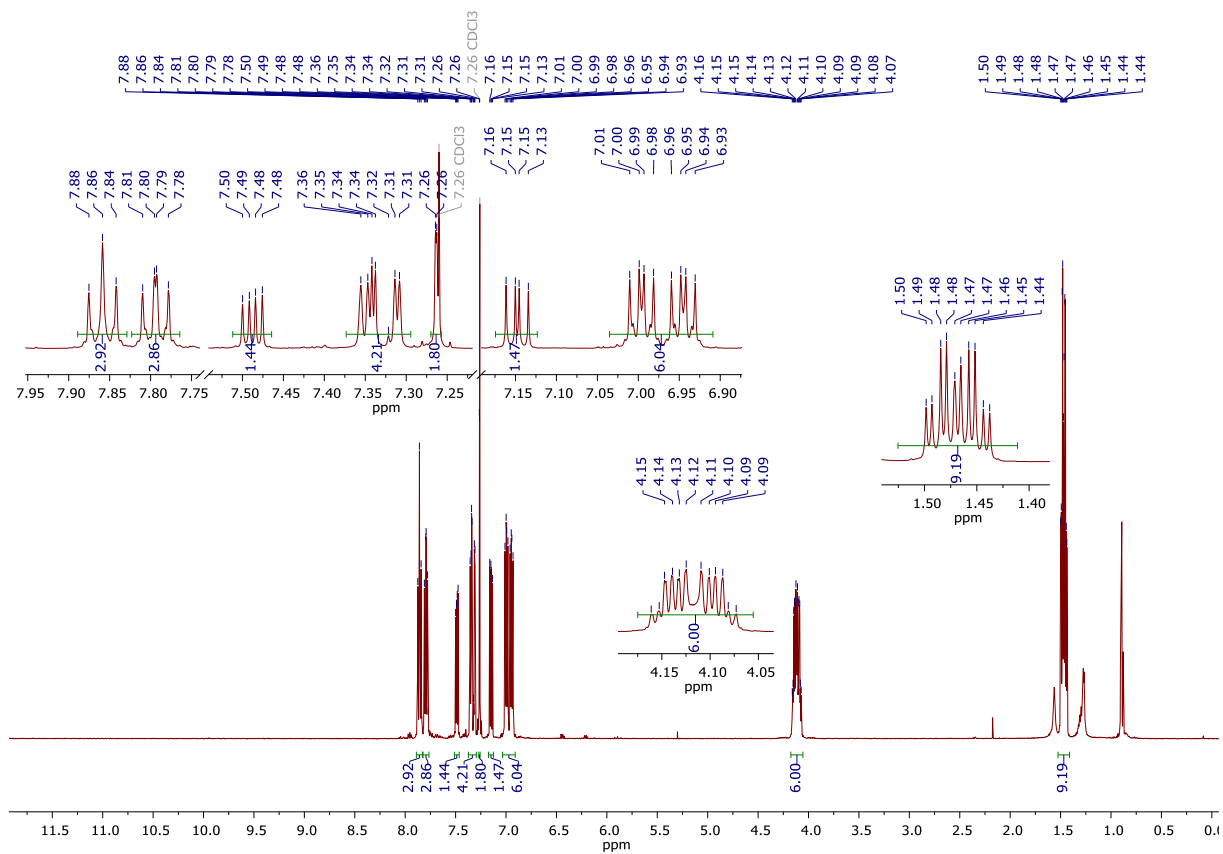

Figure S1.  $^1\text{H}$  NMR ( $\text{CDCl}_3$ , 500 MHz) spectrum of **5**.

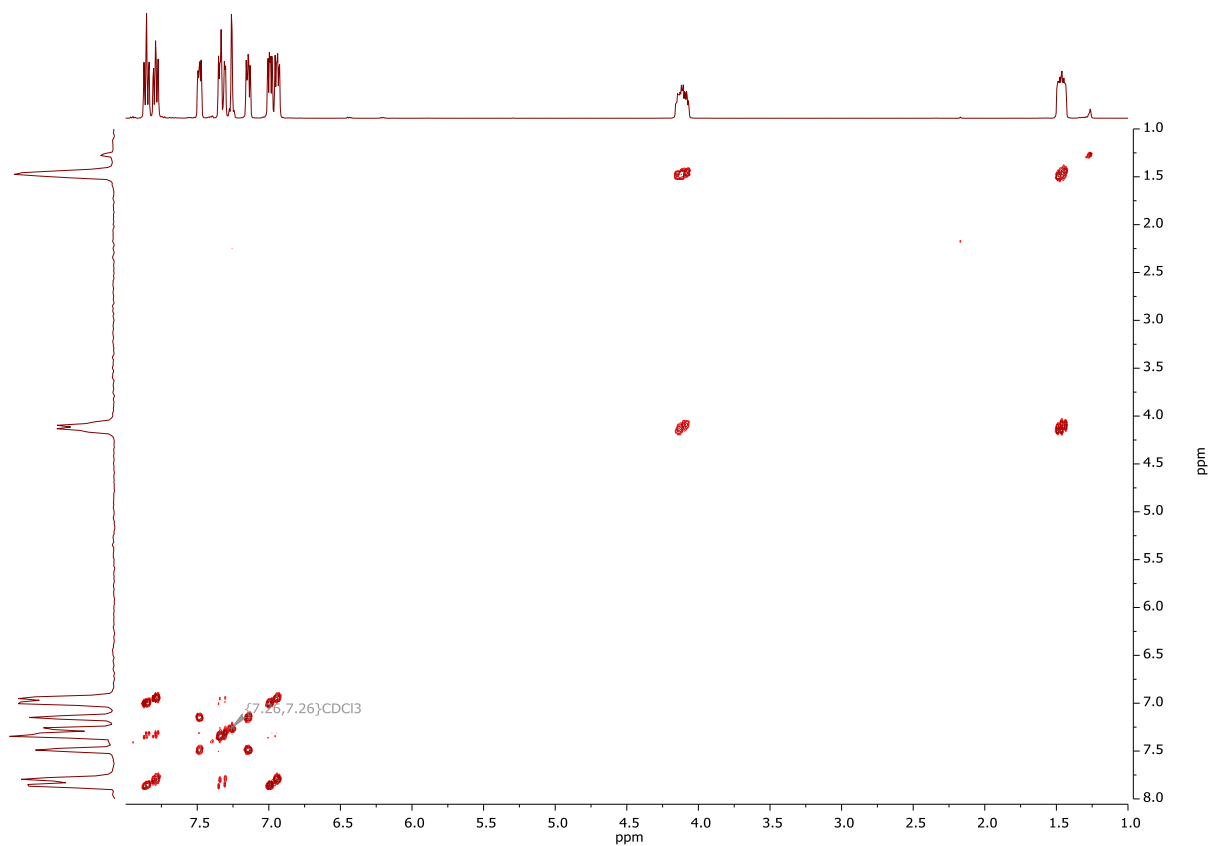

Figure S2.  $^1\text{H}$ - $^1\text{H}$  COSY NMR ( $\text{CDCl}_3$ , 500 MHz) spectrum of **5**.

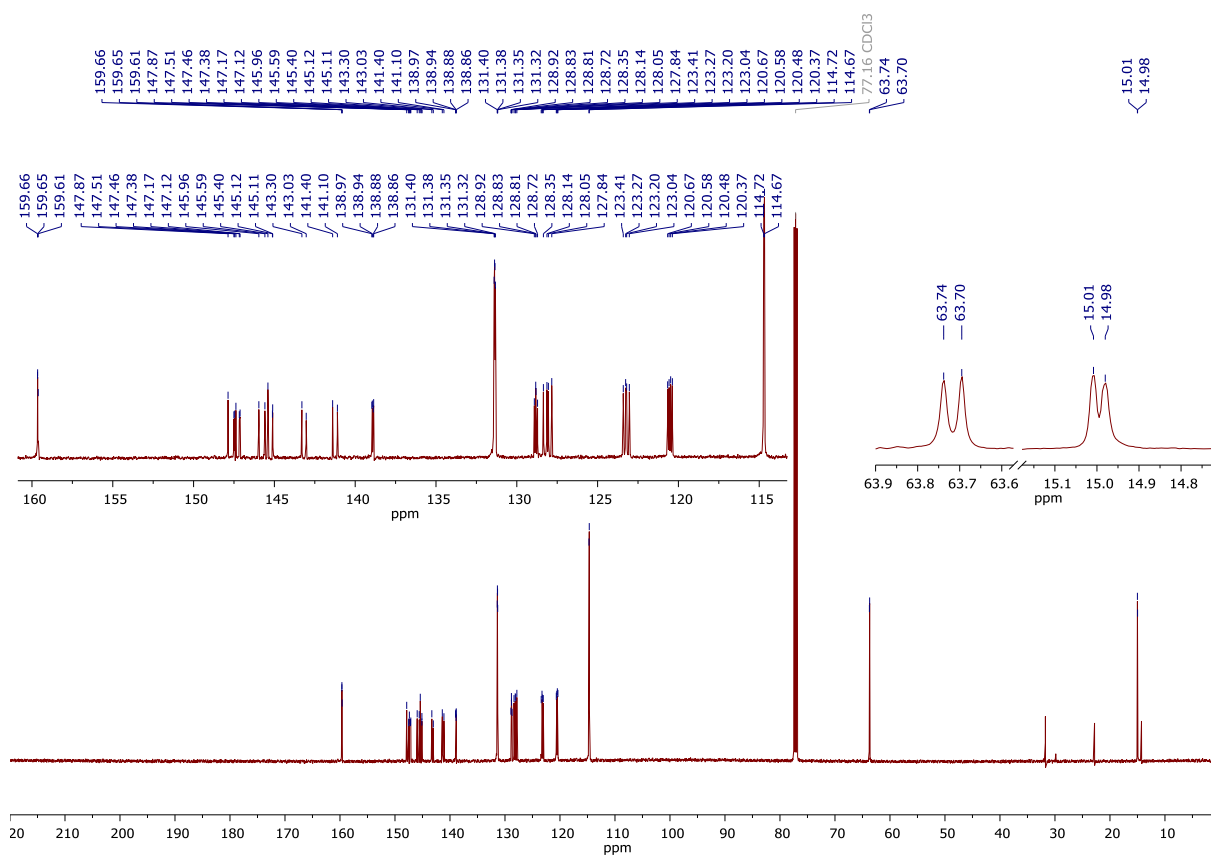

Figure S3.  $\{^1\text{H}\}^{13}\text{C}$  NMR ( $\text{CDCl}_3$ , 125 MHz) spectrum of 5.

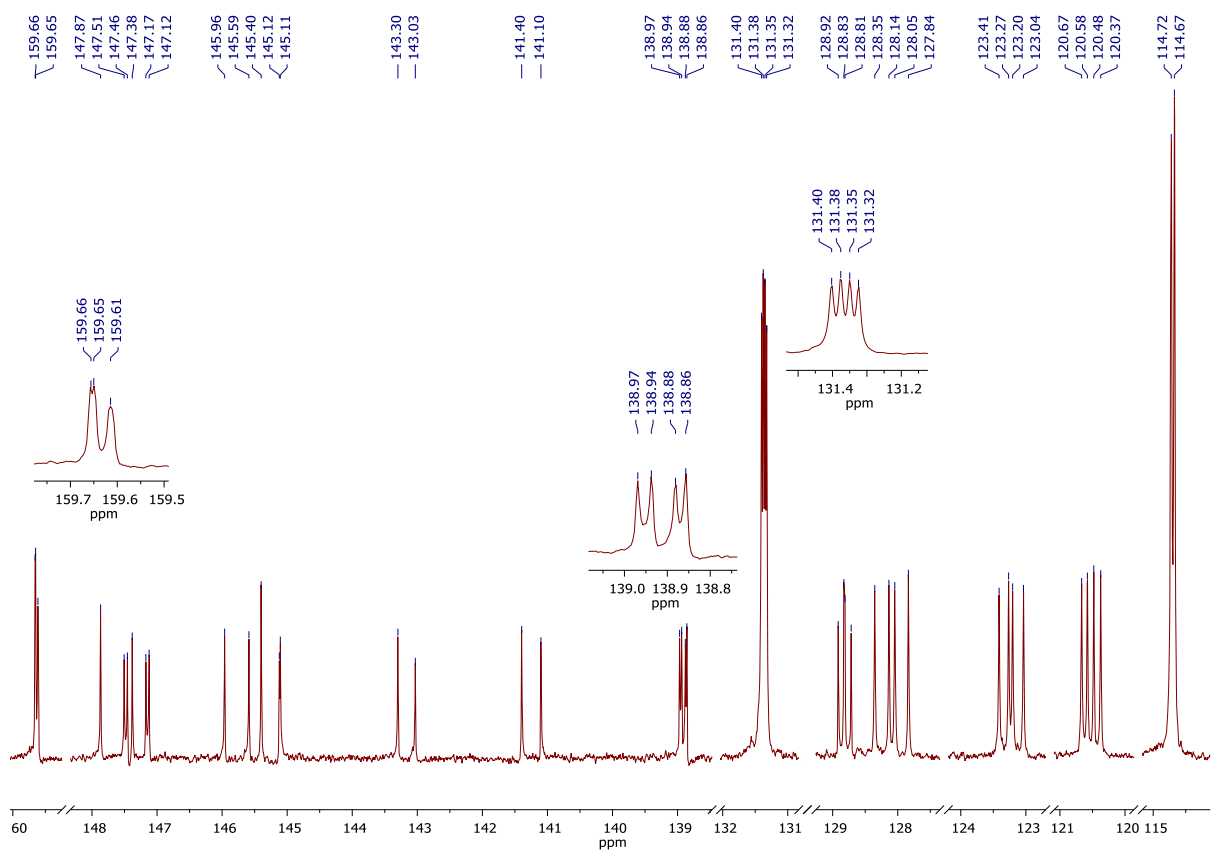

Figure S4. 160-113 ppm inset of  $\{^1\text{H}\}^{13}\text{C}$  NMR ( $\text{CDCl}_3$ , 125 MHz) spectrum of 5.

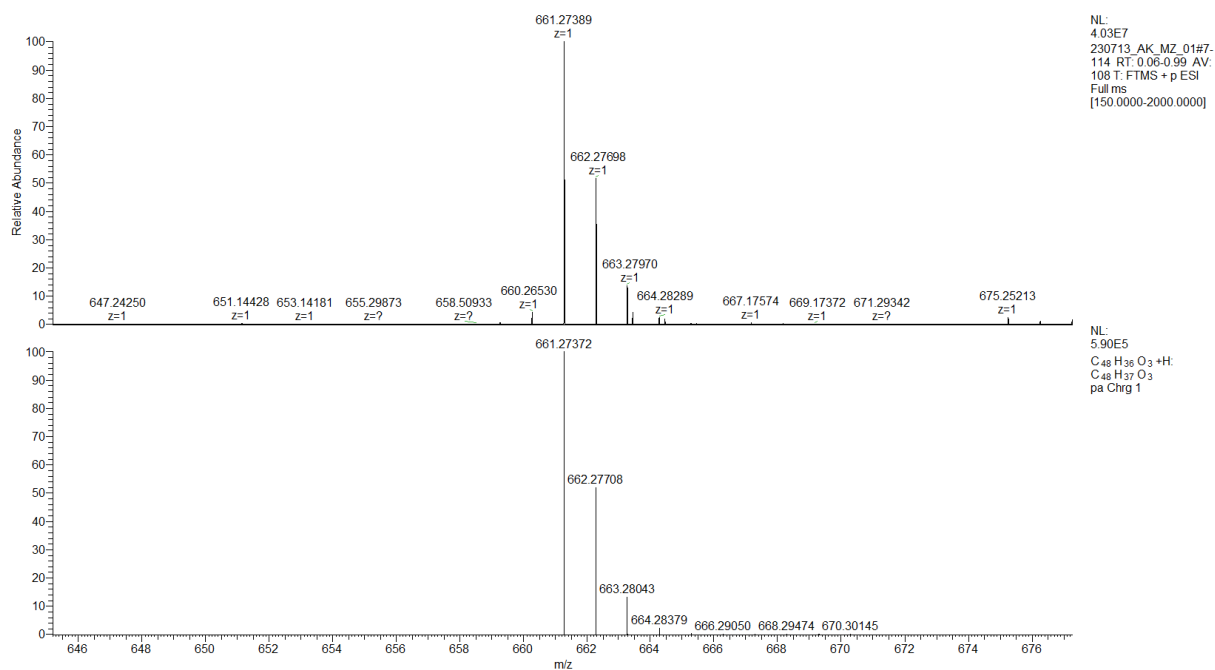

Figure S5. ESI-HRMS (TOF) spectrum of **5**.

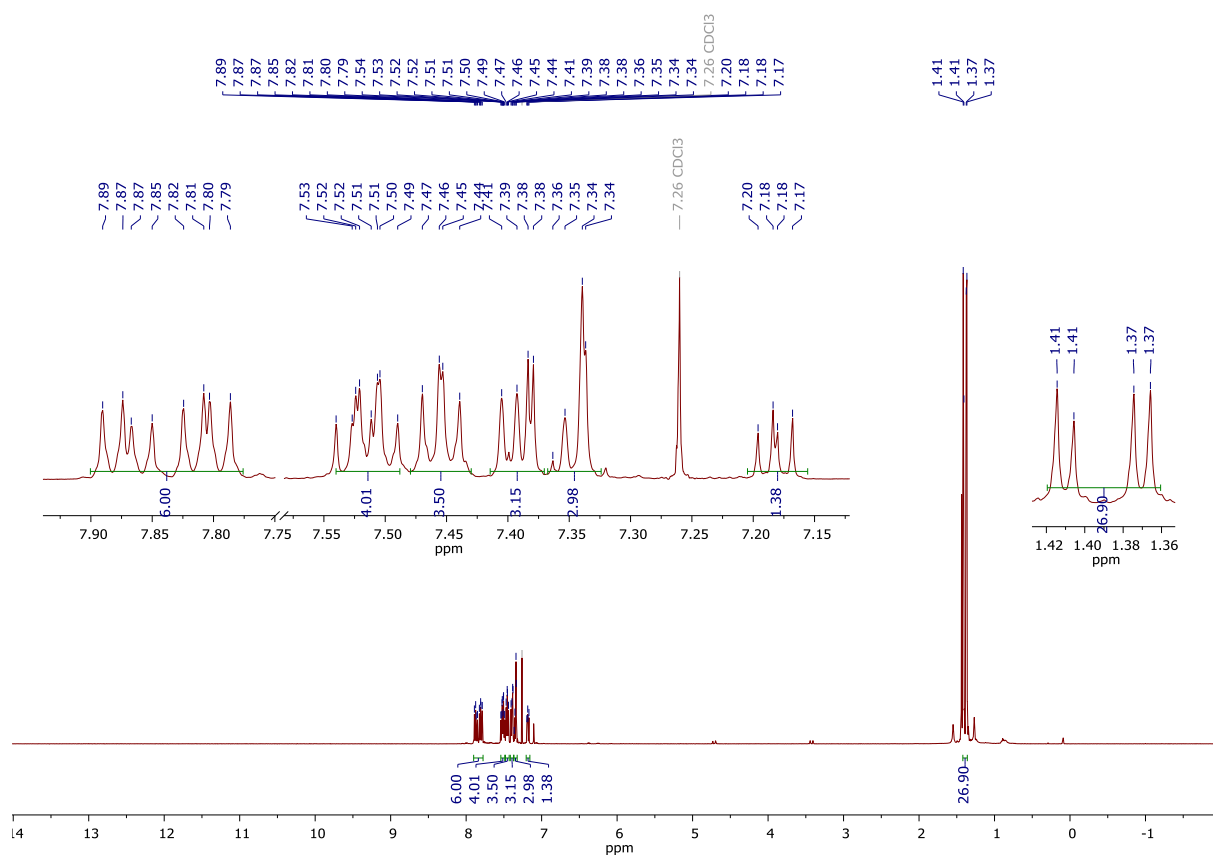

Figure S6.  $^1\text{H}$  NMR ( $\text{CDCl}_3$ , 500 MHz) spectrum of **6**.

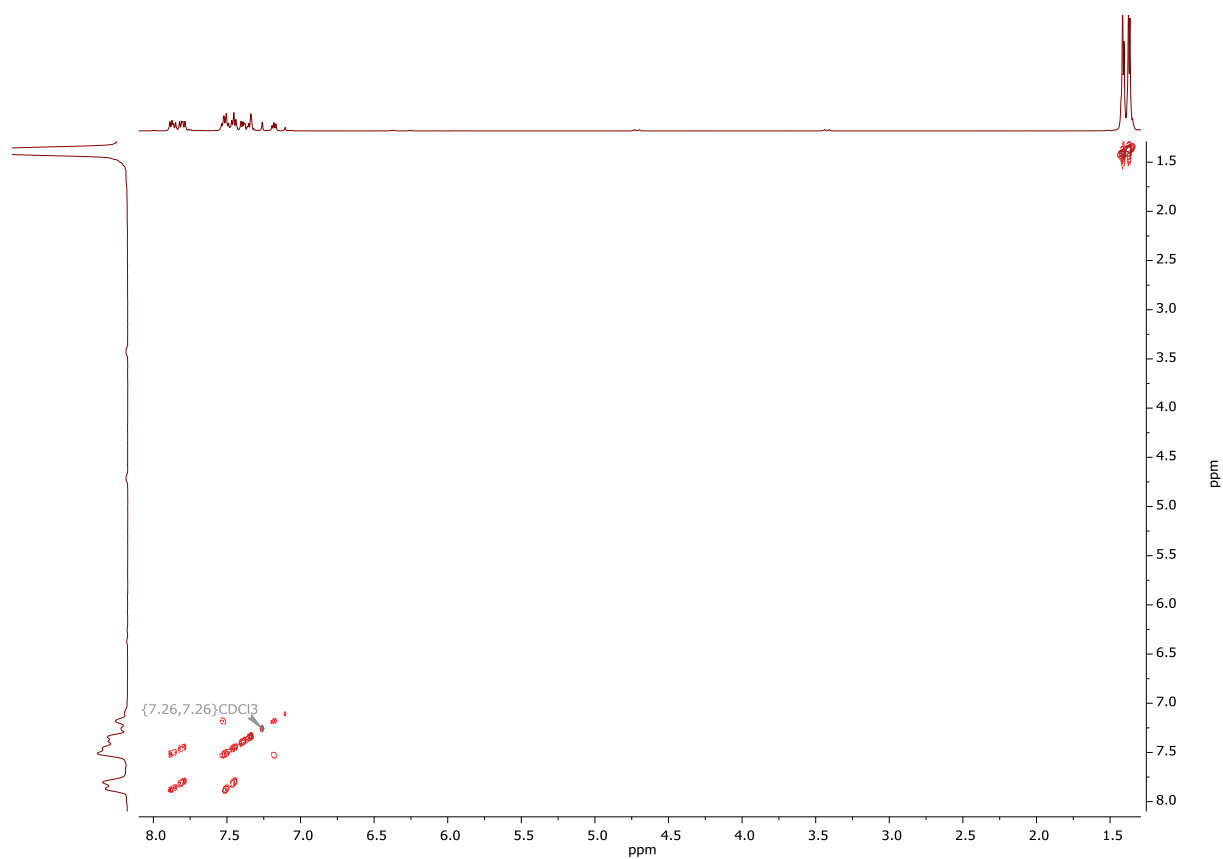

**Figure S7.**  $^1\text{H}$ - $^1\text{H}$  COSY NMR ( $\text{CDCl}_3$ , 500 MHz) spectrum of **6**.

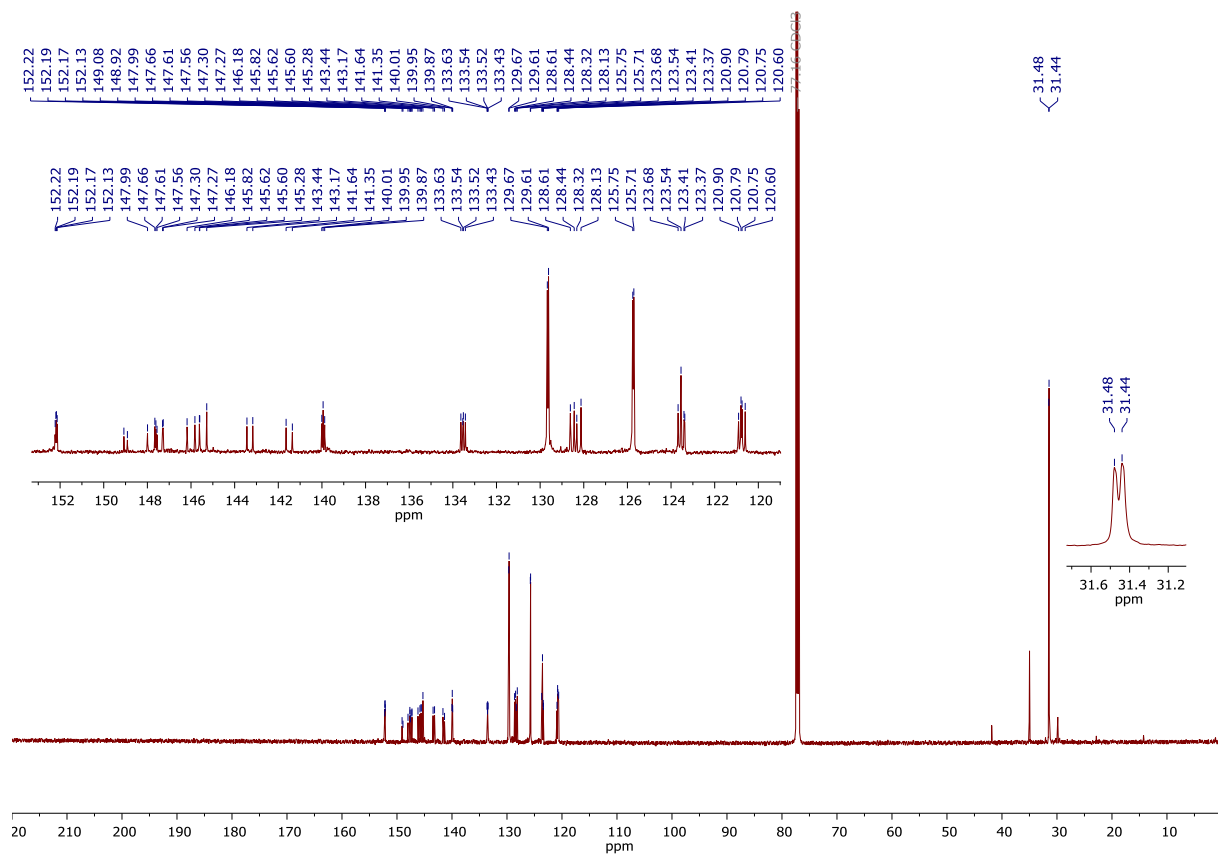

**Figure S8.**  $\{^1\text{H}\}^{13}\text{C}$  NMR ( $\text{CDCl}_3$ , 125 MHz) spectrum of **6**.

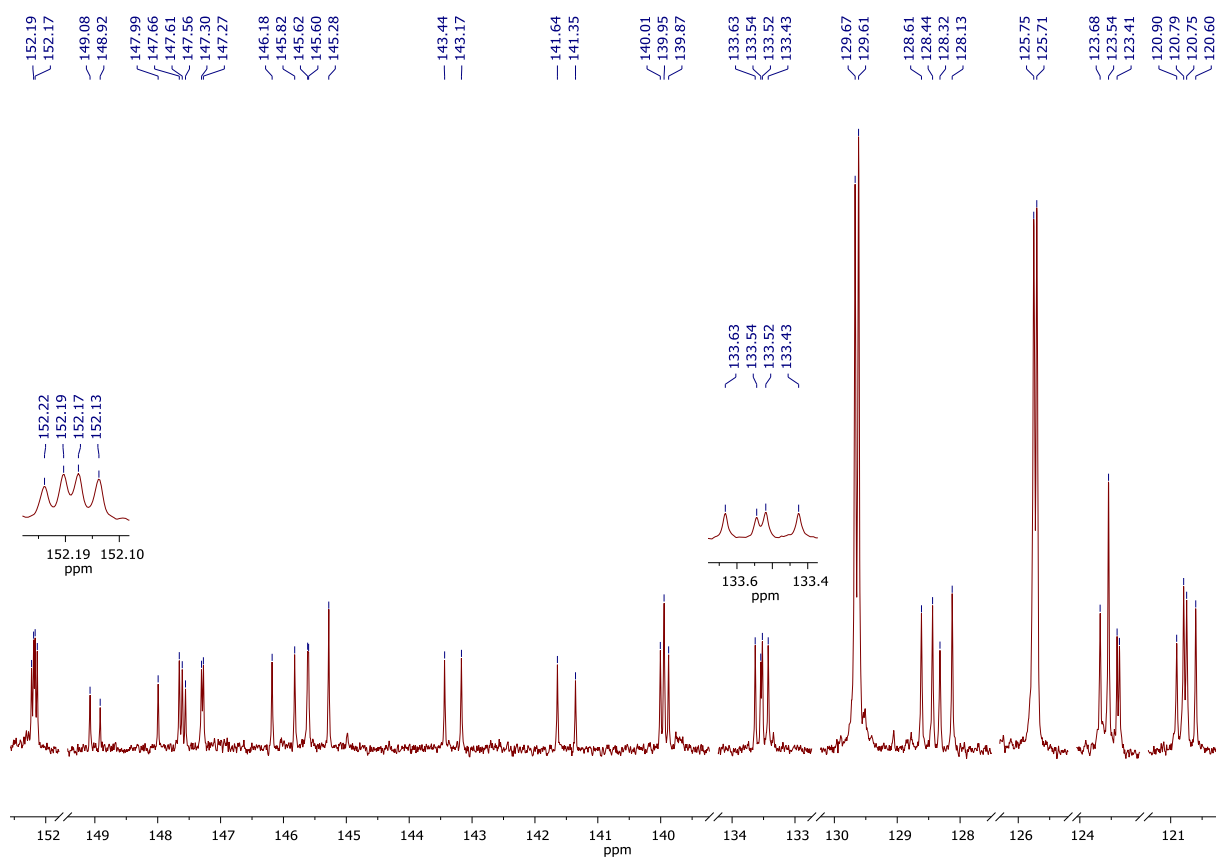

**Figure S9.** 153-120 ppm inset of the  $\{^1\text{H}\}^{13}\text{C}$  NMR ( $\text{CDCl}_3$ , 125 MHz) spectrum of **6**.

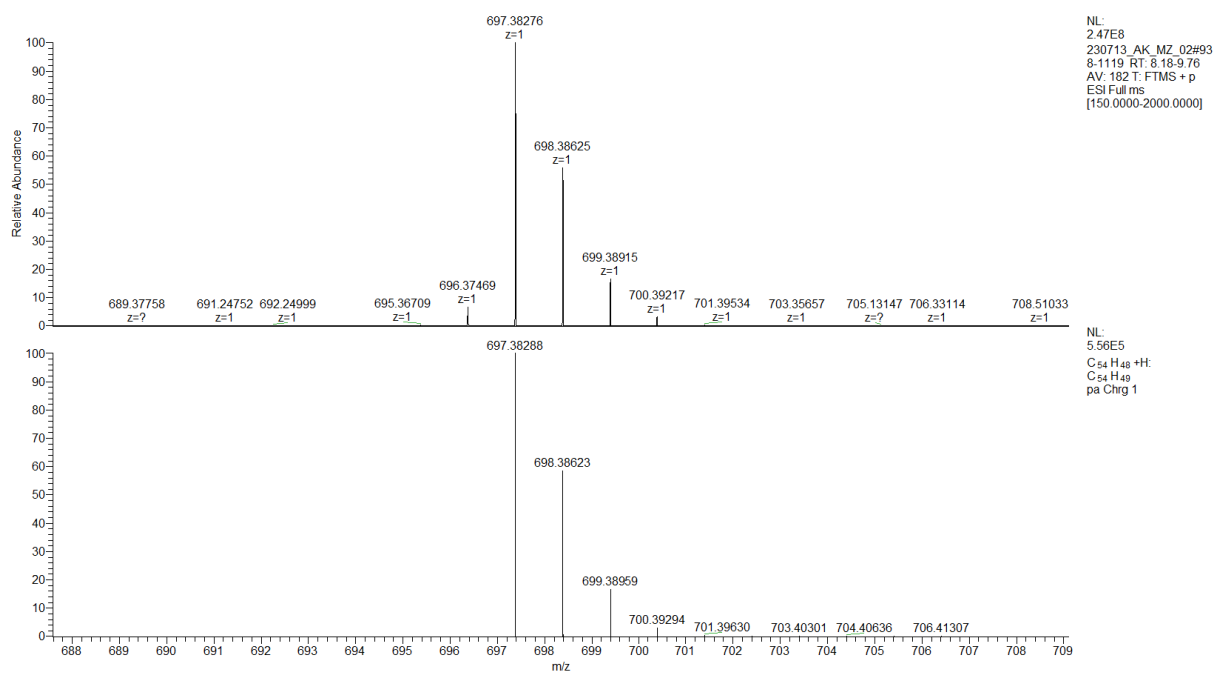

**Figure S10.** ESI-HRMS (TOF) spectrum of **6**.

## Comparison of the caesium selectivity of sumanene derivatives with the selectivity of exemplary receptors reported in the literature

The construction of new chemical sensors (including electrochemical devices) requires the synthesis of selective molecular receptors. So far, a significant number of various receptors sensitive towards caesium cations have been proposed in the literature. Electrochemical sensors based on such ligands exhibited different selectivity pattern in terms of values of potentiometric selectivity coefficients. Generalizing, the selectivity of ion-selective electrodes containing the sumanene derivatives presented in this work are comparable (or even better) to the selectivity of the sensors based on the most frequently used for this purpose bis(benzo-18-crown-6) derivatives with various spacers [1-3] or macrocyclic diamide derivatives [4]. However, better selectivity of caesium recognition was noticed for carefully tuned structures of calix[6]arene esters [5] and calix[4]crown-ethers [6]. Finally, it should be stressed that simplified structure of the proposed sumanene receptors ensured performance of the sensors compared to the previously developed devices based on n-octyloxybenzene sumanene [7].

### Supporting references:

- [1] K. Kimura, A. Ishikawa, H. Tamura and T. J. Shono, *J. Chem. Soc., Perkin Trans. 2*, 1984, 447.
- [2] K. W. Fung and K. H. J. Wong, *J. Electroanal. Chem.*, 1980, **111**, 359.
- [3] E. Luboch, A. Cygan and J. F. Biernat, *Tetrahedron*, 1991, **47**, 4101.
- [4] Shamsipur, S.Y. Kazemi, H. Sharghi, K. Niknam, J. Fresenius, *Anal. Chem.*, 2001, **371**, 1104-1108.
- [5] A. Cadogan, D. Diamond, M. R. Smyth, G. Svehla, M. A. McKervey, E. M. Seward and S. J. Harris, *Analyst*, 1990, **115**, 1207.
- [6] C. Pérez-Jiménez, L. Escriche, J. Casabó, *Anal. Chim. Acta*, 1998, **371**, 155-162.
- [7] A. Kasprzak, A. Tobolska, H. Sakurai, W. Wróblewski, *Dalton Trans.*, 2022, **51**, 468–472.

**Table S1.** Values of selectivity coefficients ( $\log K_{Cs, x}$ ) of potentiometric sensors formulated with sumanene derivative **3** and various amounts of lipophilic salt KTFPB in PVC/o-NPOE membranes (mean values calculated for 3 electrode specimens).

|           | $\log K_{Cs, Li}$ | $\log K_{Cs, Na}$ | $\log K_{Cs, K}$ | $\log K_{Cs, NH_4}$ | $\log K_{Cs, Rb}$ | $\log K_{Cs, Ba}$ | $\log K_{Cs, Ca}$ |
|-----------|-------------------|-------------------|------------------|---------------------|-------------------|-------------------|-------------------|
| 5% KTFPB  | -3.10             | -2.65             | -1.20            | -1.55               | -0.50             | -3.60             | -3.80             |
| 20% KTFPB | -3.20             | -2.70             | -1.25            | -1.55               | -0.55             | -3.30             | -3.60             |
| 40% KTFPB | -3.45             | -2.90             | -1.35            | -1.65               | -0.55             | -3.30             | -3.60             |
| 70% KTFPB | -3.40             | -2.85             | -1.35            | -1.65               | -0.60             | -3.20             | -3.55             |

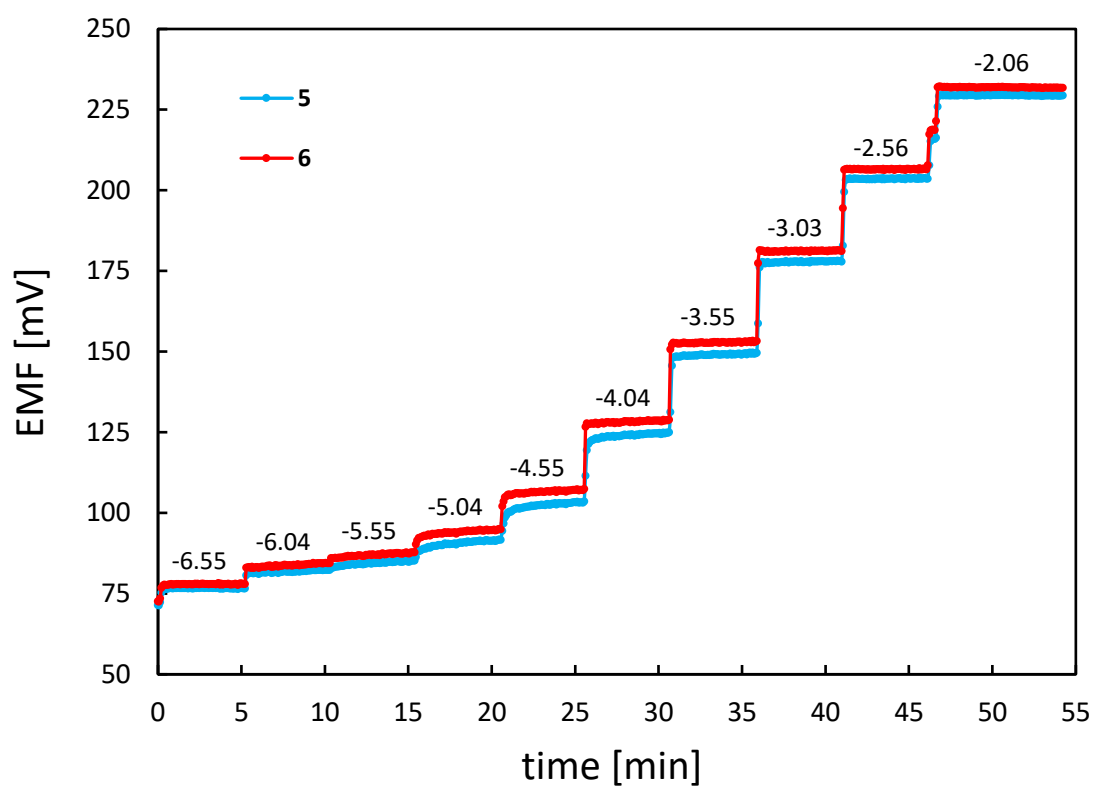

**Figure S11.** Dynamic responses of sensors formulated with sumanene receptor **5** and **6** (20 mol% KTFPB, PVC/o-NPOE) recorded increasing stepwise the activity of caesium cations in 0.01 M  $NaNO_3$  solution.



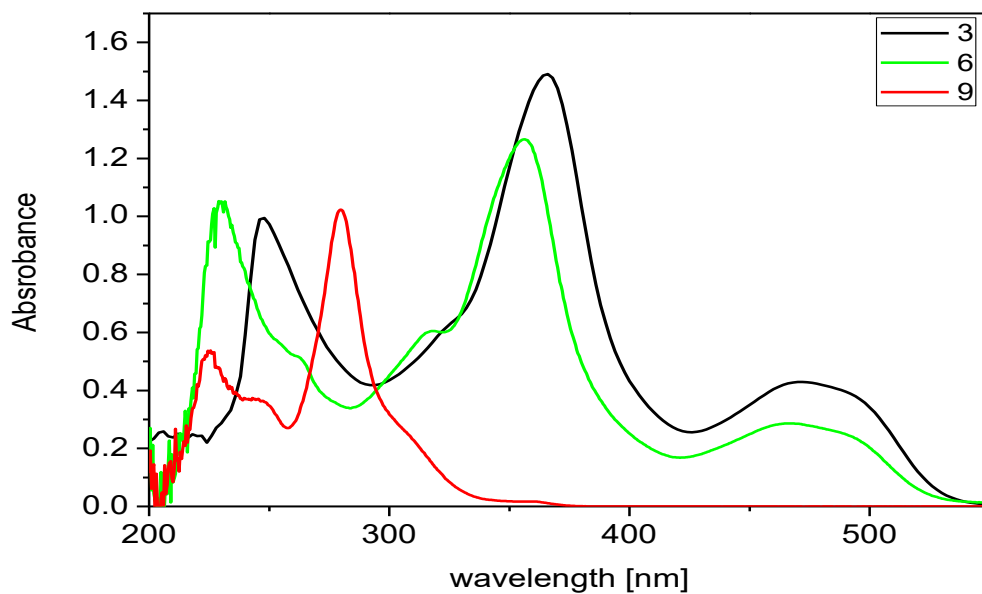

**Figure S12.** UV-Vis spectra of investigated sumanene derivatives **3**, **6**, **9** ( $2 \times 10^{-5}$  M) in mixture of THF and water (1:1).

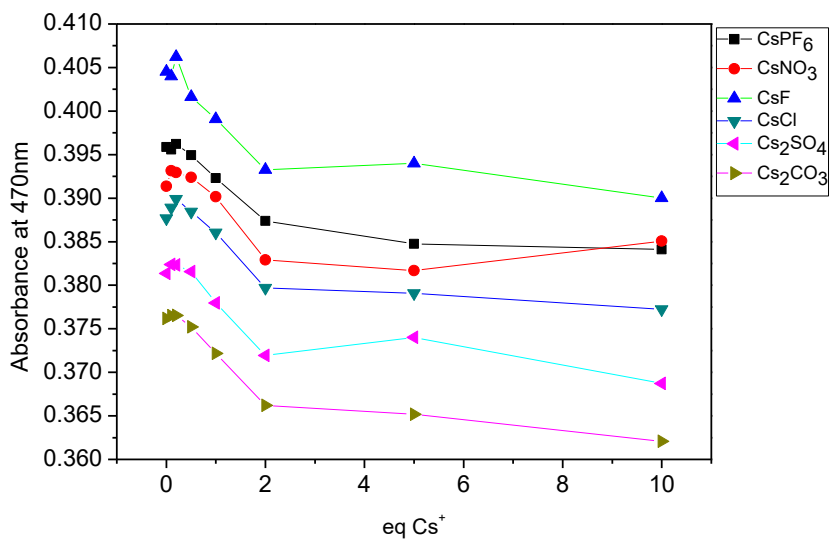

**Figure S13.** Titration curves of compound **3** ( $2 \times 10^{-5}$  M) with different caesium salts (absorption spectroscopy) in mixture of THF and water (1:1).

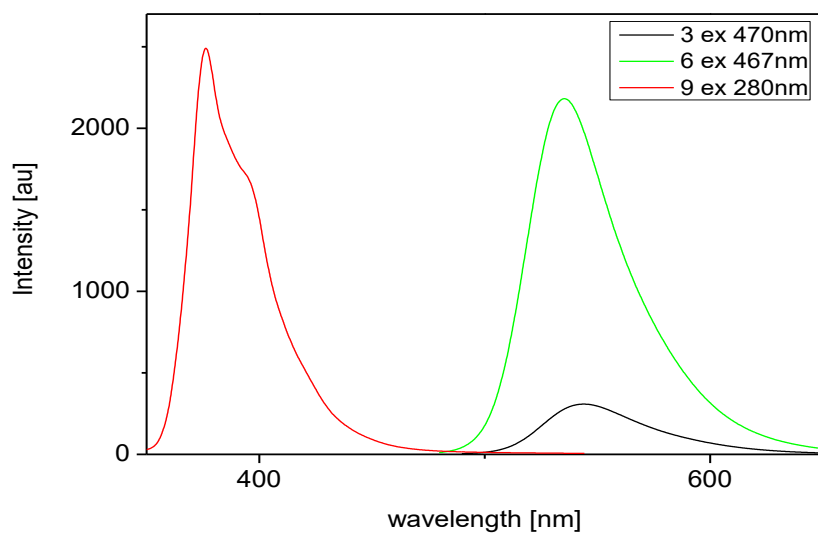

**Figure S14.** Emission spectra of investigated sumanene derivatives ( $\text{CHCl}_3$ ,  $2 \times 10^{-5}$  M).

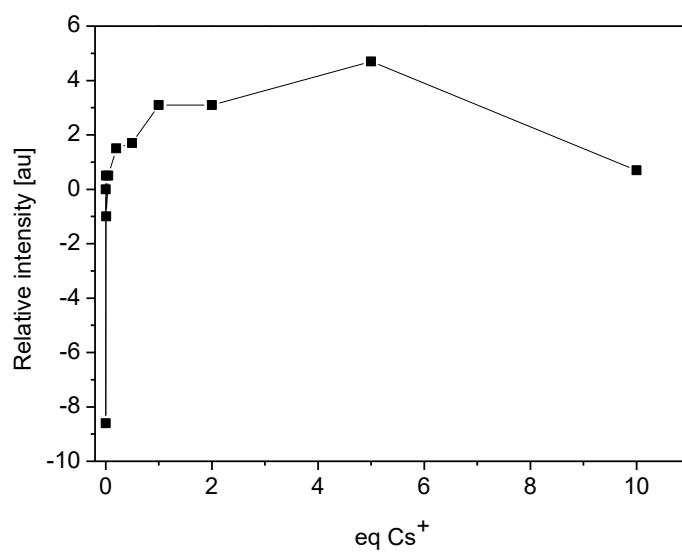

**Figure S15.** Titration curve of compound **3** ( $2 \times 10^{-5}$  M) with  $\text{LiPF}_6$ , (fluorescence spectrum),  $\lambda_{\text{ex}} = 350\text{nm}$ , in mixture of THF and water (1:1).

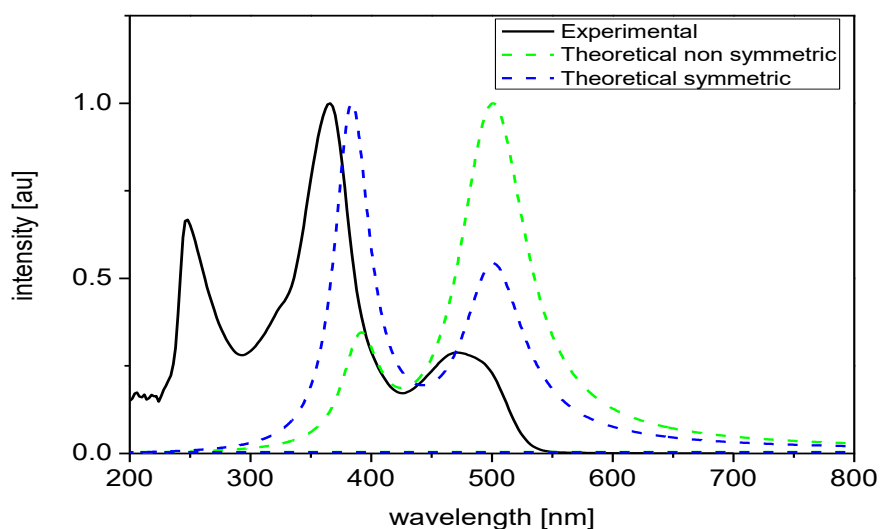

**Figure S16.** Computed and experimental UV-Vis spectra of compound **3**.

**Table S2.** Calculated values of solvation energies for different sumanene receptors using NWChem software (vs 6.8) within COSMO model, for symmetrical diastereoisomers (except compound **6**). The value of dielectric constant of o-NPOE in the PVC matrix ( $\epsilon_{\text{NPOE/PVC}} = 14$ ) was used for calculations (E. Bakker, P. Bühlmann, E. Pretsch, *Chem. Rev.* **1997**, *97*, 3083–3132)

| Compound                                                        | Solvation energy [kJ/mol] | Solubility     | Structure        |
|-----------------------------------------------------------------|---------------------------|----------------|------------------|
| <b>1</b> (sumanene)                                             | 24.2                      | insoluble      | unmodified       |
| <b>8</b> (2-nitrosumanene)                                      | 36.6                      | poorly soluble | mono-substituted |
| <b>9</b> (2-iodosumanene)                                       | 26.7                      | soluble        |                  |
| <b>2</b> (tris(phenyl)methidene)sumanene)                       | 51.6                      | soluble        | tris-substituted |
| <b>3</b> (tris(4-methoxyphenyl)methidene)sumanene)              | 75.7                      | soluble        |                  |
| <b>6</b> (tris(4- <i>tert</i> -butylphenyl)methidene)-sumanene) | 56.9                      | soluble        |                  |

**Table S3.** Atomic coordinates for optimised structure of compound 3 (B3LYP/ 6-311++G(d,p))

|   | x       | y       | z       |   | x       | y       | z       |   | x       | y       | z       |
|---|---------|---------|---------|---|---------|---------|---------|---|---------|---------|---------|
| C | -0.5926 | 1.2780  | -1.4017 | C | 7.7675  | -2.0899 | 0.7523  | H | 0.8549  | 6.4172  | 1.7964  |
| C | 0.8308  | 1.1315  | -1.3972 | H | 7.5411  | -3.6089 | 2.2470  | C | -2.0736 | 7.7707  | 0.7531  |
| C | -1.6639 | -2.0800 | -0.7810 | C | 7.1298  | -1.3473 | -0.2474 | H | -0.6450 | 8.3326  | 2.2486  |
| C | 0.5654  | -1.2854 | -1.3962 | O | 9.0867  | -1.9833 | 1.0737  | C | -2.3977 | 6.8482  | -0.2476 |
| C | -1.3950 | 0.1529  | -1.3974 | C | 5.7715  | -1.5338 | -0.4896 | O | -2.8258 | 8.8592  | 1.0759  |
| C | 1.4040  | -0.1259 | -1.4007 | H | 7.6793  | -0.6365 | -0.8500 | C | -1.5568 | 5.7655  | -0.4910 |
| C | 1.4218  | 2.2247  | -0.7539 | C | 9.8912  | -1.0525 | 0.3601  | H | -3.2880 | 6.9692  | -0.8501 |
| C | -0.9690 | 2.4810  | -0.7825 | H | 10.8895 | -1.1356 | 0.7863  | C | -4.0346 | 9.0906  | 0.3629  |
| C | -0.8101 | -1.1530 | -1.4008 | H | 9.5257  | -0.0281 | 0.4889  | H | -4.4620 | 9.9960  | 0.7902  |
| C | -2.6373 | 0.1187  | -0.7544 | C | -0.3809 | 5.5653  | 0.2457  | H | -4.7384 | 8.2614  | 0.4911  |
| C | 2.6336  | -0.4013 | -0.7805 | H | 1.5786  | 4.6853  | 0.2609  | C | -4.6297 | -3.1123 | 0.2456  |
| C | 1.2161  | -2.3435 | -0.7521 | C | -0.0611 | 6.5282  | 1.2252  | H | -4.8476 | -0.9753 | 0.2596  |
| H | 3.2352  | 2.7918  | 0.2977  | H | -1.8094 | 5.0790  | -1.2890 | C | -5.6251 | -3.3163 | 1.2236  |
| H | -4.0354 | 1.4064  | 0.2958  | C | -0.8915 | 7.6033  | 1.4865  | H | -3.4918 | -4.1070 | -1.2867 |
| C | 0.3189  | 3.2212  | -0.4888 | C | 5.0107  | -2.4525 | 0.2471  | C | -6.1416 | -4.5729 | 1.4844  |
| C | 2.7122  | 2.0095  | -0.2432 | H | 3.2689  | -3.7098 | 0.2629  | H | -5.9879 | -2.4673 | 1.7938  |
| C | -2.2772 | 2.5057  | -0.2595 | C | 5.6855  | -3.2116 | 1.2256  | C | -5.6944 | -5.6806 | 0.7523  |
| H | 9.9312  | -1.2952 | -0.7071 | H | 5.3025  | -0.9713 | -1.2869 | H | -6.8978 | -4.7236 | 2.2454  |
| C | 0.5449  | 4.4617  | 0.0036  | C | 7.0320  | -3.0302 | 1.4857  | C | -4.7318 | -5.5006 | -0.2468 |
| H | 4.2482  | 0.6041  | 0.2694  | H | 5.1319  | -3.9497 | 1.7968  | O | -6.2620 | -6.8760 | 1.0745  |
| H | -1.6014 | -3.9806 | 0.2697  | C | -2.9491 | -1.3346 | -0.4883 | C | -4.2140 | -4.2312 | -0.4899 |
| C | 2.6306  | -1.8867 | -0.4865 | C | -4.1367 | -1.7588 | 0.0033  | H | -4.3906 | -6.3324 | -0.8484 |
| C | 0.3842  | -3.3533 | -0.2417 | C | -1.0313 | -3.2247 | -0.2567 | C | -5.8576 | -8.0389 | 0.3624  |
| C | 3.3086  | 0.7194  | -0.2572 | C | -3.0963 | 1.3442  | -0.2448 | H | -6.4292 | -8.8614 | 0.7889  |
| H | 0.7998  | -4.1972 | 0.2998  | H | -2.6471 | 3.3775  | 0.2665  | H | -4.7879 | -8.2344 | 0.4922  |
| C | 3.5919  | -2.7026 | 0.0056  | H | -3.8448 | 9.2479  | -0.7041 | H | -6.0870 | -7.9532 | -0.7051 |

**Table S4.** Atomic coordinates for optimised structure of compound 1 (PSPW/Vosko)

|   | x         | y         | z         |
|---|-----------|-----------|-----------|
| C | 2.309534  | -1.250662 | 0.043861  |
| C | 1.261298  | -0.591078 | 0.654935  |
| C | 1.150589  | 0.777242  | 0.654313  |
| C | 2.081820  | 1.594236  | 0.043376  |
| C | -0.120446 | 1.382960  | 0.655284  |
| C | -0.071382 | 2.619607  | 0.043016  |
| C | -1.249535 | 0.607229  | 0.656879  |
| C | -2.418587 | 1.006281  | 0.043026  |
| C | -1.137455 | -0.798016 | 0.657504  |
| C | -2.234996 | -1.371277 | 0.046218  |
| C | 0.099951  | -1.387474 | 0.656778  |
| C | 0.341177  | -2.599232 | 0.041941  |
| H | 4.176231  | -0.877458 | -0.962162 |
| H | -2.849830 | -3.178570 | -0.951750 |
| C | 1.394713  | 2.928517  | -0.209735 |
| C | -1.276130 | 3.103716  | -0.437446 |
| C | 3.209994  | 0.959694  | -0.445639 |
| H | 1.766597  | 3.715565  | 0.457509  |
| H | 1.561745  | 3.284119  | -1.229400 |
| H | -0.676161 | -4.211674 | -0.953109 |
| H | -1.332509 | 4.063351  | -0.940841 |
| C | -2.436333 | 2.303917  | -0.439622 |
| C | -3.230196 | -0.252328 | -0.213378 |
| C | -2.049298 | -2.654661 | -0.440776 |
| H | -4.114038 | -0.319094 | 0.438310  |
| H | -3.612250 | -0.287140 | -1.237079 |
| H | 2.068320  | -3.009157 | -1.221750 |
| H | -3.311881 | 2.689926  | -0.950808 |
| C | 1.840071  | -2.676867 | -0.206240 |
| C | 3.326666  | -0.445956 | -0.443098 |
| H | 3.978346  | 1.522166  | -0.965501 |
| C | -0.775786 | -3.258633 | -0.443330 |
| H | 2.330113  | -3.389834 | 0.468826  |

**Table S5.** Atomic coordinates for optimised structure of 1:1 complex of compound 1 and caesium ion at concave site (PSPW/Vosko)

|    | x         | y         | z         |
|----|-----------|-----------|-----------|
| C  | 2.614815  | 0.110480  | 0.600407  |
| C  | 1.399467  | 0.170253  | 1.263368  |
| C  | 0.618862  | 1.298606  | 1.260178  |
| C  | 0.999978  | 2.455799  | 0.598128  |
| C  | -0.791725 | 1.183284  | 1.268161  |
| C  | -1.363193 | 2.264388  | 0.615303  |
| C  | -1.374289 | -0.060640 | 1.277009  |
| C  | -2.573457 | -0.320177 | 0.632715  |
| C  | -0.572023 | -1.224929 | 1.294093  |
| C  | -1.228774 | -2.280735 | 0.681712  |
| C  | 0.798404  | -1.108543 | 1.287042  |
| C  | 1.612744  | -2.043731 | 0.667420  |
| H  | 3.976409  | 1.312546  | -0.551920 |
| H  | -0.861844 | -4.146284 | -0.324752 |
| C  | -0.257498 | 3.274526  | 0.375501  |
| C  | -2.613737 | 2.051674  | 0.061294  |
| C  | 2.256746  | 2.448792  | 0.019929  |
| H  | -0.321226 | 4.117786  | 1.079377  |
| H  | -0.304957 | 3.717309  | -0.623389 |
| H  | 1.548841  | -3.944354 | -0.336059 |
| H  | -3.117797 | 2.836005  | -0.493049 |
| C  | -3.210554 | 0.772944  | 0.070623  |
| C  | -2.657960 | -1.825976 | 0.440163  |
| C  | -0.425248 | -3.293998 | 0.186547  |
| H  | -3.341002 | -2.280341 | 1.170521  |
| H  | -3.040404 | -2.115616 | -0.542226 |
| H  | 3.342749  | -1.577216 | -0.589186 |
| H  | -4.141459 | 0.647540  | -0.473279 |
| C  | 2.943011  | -1.358144 | 0.404811  |
| C  | 3.054414  | 1.285998  | 0.019699  |
| H  | 2.605135  | 3.301024  | -0.553812 |
| C  | 0.982490  | -3.175686 | 0.179608  |
| H  | 3.709144  | -1.691443 | 1.116386  |
| Cs | -0.022112 | -0.038882 | -1.928198 |

**Table S6.** Atomic coordinates for optimised structure of 1:1 complex of compound 1 and caesium ion at convex site (PSPW/Vosko)

|    | <i>x</i>  | <i>y</i>  | <i>z</i>  |
|----|-----------|-----------|-----------|
| C  | -1.365026 | -0.113491 | 0.360801  |
| C  | -0.409523 | -1.027276 | 0.859490  |
| C  | 0.651741  | 2.681192  | -0.410317 |
| C  | 1.356046  | 0.424425  | 0.086214  |
| C  | -0.951207 | 1.043667  | -0.254741 |
| C  | 0.933368  | -0.762542 | 0.725548  |
| C  | -0.918760 | -1.715042 | 1.943259  |
| C  | -2.533237 | -0.180305 | 1.097319  |
| C  | 0.427788  | 1.315120  | -0.397127 |
| C  | -1.676526 | 2.218354  | -0.184006 |
| C  | 1.868294  | -1.164098 | 1.665174  |
| C  | 2.578035  | 0.832809  | 0.587043  |
| H  | -0.305365 | -2.804279 | 3.690042  |
| H  | -0.896749 | 3.825534  | -1.440736 |
| C  | -2.386803 | -1.347177 | 2.056431  |
| C  | 0.015210  | -2.255812 | 2.809921  |
| C  | -3.343573 | 0.941694  | 1.053304  |
| H  | -2.647351 | -1.051953 | 3.076726  |
| H  | -3.050845 | -2.185324 | 1.809516  |
| H  | 2.174966  | 4.143451  | 0.002975  |
| H  | 2.053685  | -2.324073 | 3.465057  |
| C  | 1.391226  | -1.977209 | 2.678871  |
| C  | 3.085427  | -0.272998 | 1.489837  |
| C  | 2.878290  | 2.173835  | 0.438461  |
| H  | 3.440188  | 0.117814  | 2.447145  |
| H  | 3.935895  | -0.812015 | 1.050193  |
| H  | -3.536074 | 3.010303  | 0.543936  |
| H  | -4.259959 | 0.985939  | 1.632339  |
| C  | -0.706874 | 3.354071  | -0.467513 |
| C  | -2.920276 | 2.126396  | 0.419530  |
| C  | 1.923066  | 3.089678  | -0.045820 |
| H  | -0.790667 | 4.149011  | 0.278347  |
| H  | 3.808001  | 2.577862  | 0.825187  |
| Cs | 0.014250  | -1.358608 | -2.618306 |

**Table S7.** Atomic coordinates for optimised structure of 2:1 complex of compound 1 and caesium ion (PSPW/Vosko)

|   | x         | y         | z         |
|---|-----------|-----------|-----------|
| C | 1.183971  | -3.613753 | -0.272161 |
| C | 1.045212  | -3.422220 | 1.079549  |
| C | -0.233247 | -3.191770 | 1.630895  |
| C | -1.335947 | -3.153521 | 0.814431  |
| C | -1.195871 | -3.347920 | -0.577880 |
| C | 0.047321  | -3.578217 | -1.110574 |
| C | 2.021123  | -2.811208 | 1.847386  |
| C | -0.135304 | -2.420031 | 2.776239  |
| C | 1.340684  | -2.333193 | 3.121107  |
| H | 1.648801  | -1.325211 | 3.411624  |
| H | 1.589033  | -2.981913 | 3.971787  |
| C | -2.419032 | -2.331708 | 1.079751  |
| C | -2.174248 | -2.648664 | -1.263492 |
| C | -3.165858 | -2.142435 | -0.230011 |
| H | -4.100314 | -2.724551 | -0.249737 |
| H | -3.458740 | -1.101207 | -0.406662 |
| C | 2.310769  | -3.206034 | -0.965531 |
| C | 0.398528  | -3.140967 | -2.376669 |
| C | 1.915232  | -3.108112 | -2.427921 |
| H | 2.299216  | -2.203076 | -2.907970 |
| H | 2.317998  | -3.948153 | -3.009227 |
| C | 3.207137  | -2.519656 | 1.195520  |
| C | 3.351540  | -2.714951 | -0.195955 |
| H | 4.257511  | -2.343847 | -0.665730 |
| H | 4.016982  | -2.020577 | 1.717555  |
| C | -1.263932 | -1.702391 | 3.132423  |
| C | -2.393959 | -1.658628 | 2.290021  |
| H | -3.196845 | -0.979774 | 2.561003  |
| H | -1.261410 | -1.054026 | 4.002926  |
| C | -0.612853 | -2.565841 | -3.129993 |
| C | -1.885586 | -2.316881 | -2.575369 |
| H | -2.590947 | -1.747452 | -3.172636 |
| H | -0.415945 | -2.184548 | -4.127929 |
| C | 1.247850  | 3.485526  | 0.210309  |
| C | 1.078600  | 3.278002  | -1.136452 |
| C | -0.221163 | 3.164251  | -1.678086 |
| C | -1.314069 | 3.256240  | -0.854439 |
| C | -1.140872 | 3.475487  | 0.528923  |
| C | 0.121250  | 3.592126  | 1.054907  |
| C | 1.979623  | 2.544231  | -1.889932 |
| C | -0.209832 | 2.348162  | -2.797165 |
| C | 1.249035  | 2.108694  | -3.148820 |
| H | 1.455659  | 1.070667  | -3.423035 |
| H | 1.552123  | 2.717063  | -4.012093 |
| C | -2.481726 | 2.549391  | -1.091194 |
| C | -2.186374 | 2.912333  | 1.240513  |
| C | -3.231624 | 2.484074  | 0.225798  |
| H | -4.107225 | 3.150362  | 0.228878  |
| H | -3.624629 | 1.481784  | 0.431536  |
| C | 2.325592  | 2.967804  | 0.906687  |
| C | 0.428499  | 3.154280  | 2.331765  |
| C | 1.931222  | 2.951039  | 2.373679  |
| H | 2.214069  | 2.022137  | 2.877969  |
| H | 2.430911  | 3.755714  | 2.929380  |
| C | 3.298595  | 2.336822  | 0.150500  |



|    |           |          |           |
|----|-----------|----------|-----------|
| C  | 3.129848  | 2.130628 | -1.236609 |
| H  | 3.871407  | 1.528420 | -1.750932 |
| H  | 4.157182  | 1.876337 | 0.628956  |
| C  | -1.408640 | 1.736065 | -3.123210 |
| C  | -2.535537 | 1.842363 | -2.280988 |
| H  | -1.475469 | 1.057315 | -3.967794 |
| H  | -3.407277 | 1.246011 | -2.532343 |
| C  | -0.633413 | 2.716593 | 3.106055  |
| C  | -1.926982 | 2.586578 | 2.560418  |
| H  | -2.689284 | 2.118537 | 3.175118  |
| H  | -0.474301 | 2.344806 | 4.113942  |
| Cs | 0.010587  | 0.073294 | 0.122652  |

---

**Table S8.** Atomic coordinates for optimised structure compound 2 (PSPW/Vosko)

|   | x         | y         | z         |
|---|-----------|-----------|-----------|
| C | 2.465451  | -0.847123 | -0.904901 |
| C | 1.269976  | -0.483146 | -1.514476 |
| C | 0.176946  | -1.302493 | -1.521498 |
| C | 0.184233  | -2.550972 | -0.924572 |
| C | -1.122216 | -0.756433 | -1.466596 |
| C | -1.990487 | -1.633490 | -0.826039 |
| C | -1.289740 | 0.599566  | -1.429309 |
| C | -2.329496 | 1.191190  | -0.726258 |
| C | -0.167411 | 1.452947  | -1.438249 |
| C | -0.455086 | 2.630808  | -0.761255 |
| C | 1.091114  | 0.912606  | -1.465182 |
| C | 2.159778  | 1.492538  | -0.799404 |
| H | 3.410083  | -2.511865 | 0.087078  |
| H | 0.501870  | 4.218890  | 0.338897  |
| C | -1.222589 | -2.882769 | -0.617004 |
| C | -3.127284 | -1.062833 | -0.259119 |
| C | 1.403003  | -2.987563 | -0.430917 |
| C | -1.463766 | 5.539758  | -0.415327 |
| C | -1.641177 | -4.076824 | -0.191291 |
| H | 2.698891  | 3.244215  | 0.331457  |
| H | -3.836198 | -1.678279 | 0.284034  |
| C | -3.290589 | 0.330663  | -0.210537 |
| C | -1.900192 | 2.567363  | -0.419130 |
| C | 0.642021  | 3.302564  | -0.222361 |
| C | 5.495224  | -1.491044 | -0.493681 |
| C | -2.669865 | 3.488298  | 0.189475  |
| C | 4.312187  | 0.587973  | 0.100090  |
| H | -4.116380 | 0.717966  | 0.377713  |
| C | 3.142511  | 0.420456  | -0.542925 |
| C | 2.526513  | -2.153138 | -0.426041 |
| H | 1.474565  | -3.932912 | 0.097454  |
| C | 1.923019  | 2.739861  | -0.235208 |
| C | 5.263807  | -0.446927 | 0.393422  |
| H | 4.539261  | 1.582936  | 0.478809  |
| C | 5.959772  | -0.442684 | 1.594088  |
| H | 6.502028  | -3.328443 | -0.879393 |
| H | 4.986174  | -1.483329 | -1.449978 |
| C | 6.798062  | -1.483047 | 1.922832  |
| H | 5.809275  | 0.375135  | 2.289723  |
| C | 6.986066  | -2.531841 | 1.048180  |
| H | 7.311236  | -1.478996 | 2.876260  |
| C | 6.343509  | -2.522381 | -0.173342 |
| H | 7.643473  | -3.350858 | 1.312113  |
| C | -2.299002 | 4.847142  | 0.450804  |
| H | -3.652788 | 3.171767  | 0.534683  |
| C | -2.754383 | 5.496334  | 1.591056  |
| H | -0.394712 | 7.338659  | -0.804166 |
| H | -1.142171 | 5.057897  | -1.330309 |
| C | -2.330061 | 6.769024  | 1.893785  |
| H | -3.426050 | 4.972476  | 2.262044  |
| C | -1.467057 | 7.427243  | 1.044926  |
| H | -2.671888 | 7.252056  | 2.800397  |
| C | -1.049638 | 6.813774  | -0.119272 |
| H | -1.128103 | 8.428065  | 1.281074  |
| C | -2.989710 | -4.404153 | 0.223473  |
| H | -0.903085 | -4.876716 | -0.138543 |

|   |           |           |           |
|---|-----------|-----------|-----------|
| C | -3.836125 | -5.123524 | -0.600967 |
| H | -5.032183 | -4.072212 | 2.891222  |
| H | -2.770517 | -3.460703 | 2.125145  |
| C | -5.103378 | -5.456708 | -0.178380 |
| H | -3.494795 | -5.415349 | -1.586475 |
| C | -5.533650 | -5.083109 | 1.076332  |
| H | -5.764829 | -6.009435 | -0.833640 |
| C | -4.696183 | -4.369316 | 1.905046  |
| H | -6.529104 | -5.346840 | 1.411500  |
| C | -3.433202 | -4.025490 | 1.479688  |

---

**Table S9.** Atomic coordinates for optimised structure of complex of compound 2 and caesium ion at concave site (PSPW/Vosko)

|   | x         | y         | z         |
|---|-----------|-----------|-----------|
| C | 2.407530  | -0.906272 | -0.859741 |
| C | 1.232353  | -0.537640 | -1.498181 |
| C | 0.113248  | -1.328705 | -1.495979 |
| C | 0.062809  | -2.546310 | -0.832122 |
| C | -1.170589 | -0.747852 | -1.510187 |
| C | -2.090608 | -1.585443 | -0.886381 |
| C | -1.292423 | 0.615981  | -1.508911 |
| C | -2.337254 | 1.266198  | -0.869923 |
| C | -0.148176 | 1.439169  | -1.511436 |
| C | -0.426258 | 2.656928  | -0.902562 |
| C | 1.095917  | 0.865996  | -1.492531 |
| C | 2.172579  | 1.445513  | -0.832810 |
| H | 3.301372  | -2.564508 | 0.192048  |
| H | 0.566828  | 4.295285  | 0.096937  |
| C | -1.359471 | -2.835306 | -0.568736 |
| C | -3.225703 | -0.949784 | -0.379887 |
| C | 1.270030  | -2.993992 | -0.299990 |
| C | -1.429619 | 5.644435  | -0.808602 |
| C | -1.794590 | -3.986706 | -0.014096 |
| H | 2.739072  | 3.265636  | 0.179170  |
| H | -3.994172 | -1.526295 | 0.123725  |
| C | -3.347066 | 0.446456  | -0.370439 |
| C | -1.883717 | 2.646244  | -0.620986 |
| C | 0.683671  | 3.332237  | -0.387600 |
| C | 5.460077  | -1.562408 | -0.811649 |
| C | -2.669551 | 3.622591  | -0.129191 |
| C | 4.349650  | 0.467217  | 0.013970  |
| H | -4.198111 | 0.870930  | 0.151924  |
| C | 3.131109  | 0.350281  | -0.550540 |
| C | 2.419708  | -2.194703 | -0.320108 |
| H | 1.323417  | -3.932613 | 0.242788  |
| C | 1.952598  | 2.734087  | -0.347132 |
| C | 5.306057  | -0.591262 | 0.171529  |
| H | 4.652132  | 1.450369  | 0.371827  |
| C | 6.140847  | -0.632621 | 1.281569  |
| H | 6.515075  | -3.297411 | -1.451525 |
| H | 4.852986  | -1.508205 | -1.707233 |
| C | 7.054236  | -1.648971 | 1.436238  |
| H | 6.058754  | 0.140223  | 2.037628  |
| C | 7.186470  | -2.610723 | 0.457455  |
| H | 7.689366  | -1.678307 | 2.312383  |
| C | 6.390325  | -2.560375 | -0.667954 |
| H | 7.924167  | -3.396348 | 0.563791  |
| C | -2.324205 | 4.998755  | 0.038463  |
| H | -3.674309 | 3.338697  | 0.181775  |
| C | -2.906912 | 5.720293  | 1.072609  |
| H | -0.399217 | 7.452969  | -1.266978 |
| H | -1.014718 | 5.100990  | -1.648946 |
| C | -2.548109 | 7.026073  | 1.297060  |
| H | -3.626396 | 5.232064  | 1.720804  |
| C | -1.639763 | 7.645515  | 0.465362  |
| H | -2.982820 | 7.571658  | 2.124805  |
| C | -1.090575 | 6.957475  | -0.597526 |
| H | -1.363783 | 8.677116  | 0.642376  |
| C | -3.138641 | -4.414521 | 0.215870  |
| H | -1.022823 | -4.689461 | 0.300870  |

|    |           |           |           |
|----|-----------|-----------|-----------|
| C  | -4.202221 | -3.996767 | -0.578288 |
| H  | -4.846492 | -6.442823 | 2.311454  |
| H  | -2.558048 | -5.677852 | 1.842497  |
| C  | -5.476374 | -4.441780 | -0.328026 |
| H  | -4.006505 | -3.342477 | -1.419307 |
| C  | -5.712472 | -5.308887 | 0.719588  |
| H  | -6.292997 | -4.125875 | -0.964192 |
| C  | -4.665247 | -5.746653 | 1.502384  |
| H  | -6.716114 | -5.663417 | 0.915049  |
| C  | -3.387544 | -5.316919 | 1.243623  |
| Cs | -0.039783 | 0.043930  | 1.642496  |

---

**Table S10.** Atomic coordinates for optimised structure of complex of compound 2 and caesium ion at convex site (PSPW/Vosko)

|   | x         | y         | z         |
|---|-----------|-----------|-----------|
| C | 2.067278  | -1.549794 | -0.123569 |
| C | 1.061849  | -0.889264 | -0.821453 |
| C | -0.226942 | -1.358290 | -0.880892 |
| C | -0.635495 | -2.506271 | -0.215751 |
| C | -1.312350 | -0.462182 | -0.981957 |
| C | -2.458734 | -1.023551 | -0.422420 |
| C | -1.072774 | 0.888881  | -0.973684 |
| C | -1.945296 | 1.788983  | -0.381915 |
| C | 0.246603  | 1.381780  | -0.874178 |
| C | 0.258325  | 2.612752  | -0.224692 |
| C | 1.297786  | 0.503204  | -0.809619 |
| C | 2.450561  | 0.775515  | -0.083371 |
| H | 2.412281  | -3.353191 | 1.003351  |
| H | 1.559159  | 3.881810  | 0.935223  |
| C | -2.094312 | -2.398071 | -0.023118 |
| C | -3.420237 | -0.105930 | 0.003822  |
| C | 0.380865  | -3.243330 | 0.382238  |
| C | 0.031503  | 5.773807  | 0.429973  |
| C | -2.823741 | -3.361024 | 0.580254  |
| H | 3.389646  | 2.340245  | 1.060076  |
| H | -4.336595 | -0.452912 | 0.467421  |
| C | -3.169162 | 1.268943  | 0.024748  |
| C | -1.157258 | 2.970403  | 0.001852  |
| C | 1.469689  | 2.955404  | 0.380326  |
| C | 4.815296  | -3.021074 | 0.437610  |
| C | -1.704117 | 4.029595  | 0.633192  |
| C | 4.235300  | -0.664801 | 0.900736  |
| H | -3.902902 | 1.900446  | 0.514465  |
| C | 3.069667  | -0.523078 | 0.238297  |
| C | 1.700568  | -2.782538 | 0.418181  |
| H | 0.149204  | -4.135311 | 0.955157  |
| C | 2.540825  | 2.058346  | 0.446194  |
| C | 4.907116  | -1.884335 | 1.232902  |
| H | 4.710080  | 0.249030  | 1.255279  |
| C | 5.705572  | -1.939493 | 2.369426  |
| H | 5.366153  | -5.061961 | 0.166550  |
| H | 4.248166  | -2.973584 | -0.484080 |
| C | 6.321114  | -3.112195 | 2.741534  |
| H | 5.813397  | -1.051234 | 2.982011  |
| C | 6.184661  | -4.240972 | 1.962155  |
| H | 6.915505  | -3.146147 | 3.645453  |
| C | 5.444340  | -4.187147 | 0.800059  |
| H | 6.672582  | -5.162810 | 2.252294  |
| C | -1.092106 | 5.246784  | 1.055431  |
| H | -2.762692 | 3.939652  | 0.875243  |
| C | -1.665947 | 5.956760  | 2.104673  |
| H | 1.449255  | 7.364101  | 0.357863  |
| H | 0.447092  | 5.258686  | -0.427218 |
| C | -1.103181 | 7.129732  | 2.546648  |
| H | -2.559293 | 5.565109  | 2.578960  |
| C | 0.022345  | 7.629569  | 1.927856  |
| H | -1.551022 | 7.664292  | 3.374618  |
| C | 0.582698  | 6.955200  | 0.861368  |
| H | 0.457838  | 8.559391  | 2.270451  |
| C | -4.233699 | -3.444544 | 0.795822  |
| H | -2.257841 | -4.208846 | 0.965111  |

|    |           |           |           |
|----|-----------|-----------|-----------|
| C  | -5.171325 | -2.788536 | 0.002496  |
| H  | -6.384409 | -5.112545 | 2.810474  |
| H  | -3.978379 | -4.835517 | 2.398072  |
| C  | -6.517168 | -2.962257 | 0.219467  |
| H  | -4.830518 | -2.177235 | -0.824283 |
| C  | -6.959131 | -3.785850 | 1.236948  |
| H  | -7.233633 | -2.465808 | -0.423086 |
| C  | -6.043746 | -4.450394 | 2.024877  |
| H  | -8.020218 | -3.925081 | 1.399090  |
| C  | -4.698256 | -4.292250 | 1.795918  |
| Cs | 0.221468  | -0.020762 | -4.049968 |

---

**Table S11.** Atomic coordinates for optimised structure of 2:1 complex of compound 2 and caesium ion (PSPW/Vosko)

|   | x         | y         | z         |
|---|-----------|-----------|-----------|
| C | 1.658494  | -2.402874 | -2.155860 |
| C | 1.127147  | -1.403304 | -2.966882 |
| C | -0.216850 | -1.263257 | -3.188787 |
| C | -1.153031 | -2.088500 | -2.579721 |
| C | -0.773927 | 0.016932  | -3.399537 |
| C | -2.091577 | 0.046209  | -2.946921 |
| C | 0.038872  | 1.122456  | -3.375908 |
| C | -0.385810 | 2.349285  | -2.879102 |
| C | 1.426648  | 0.987651  | -3.146919 |
| C | 1.928347  | 2.124577  | -2.519293 |
| C | 1.949422  | -0.257265 | -2.929302 |
| C | 3.003788  | -0.476177 | -2.051779 |
| H | 1.058342  | -4.140839 | -1.018687 |
| H | 3.488387  | 2.764291  | -1.176531 |
| C | -2.425835 | -1.340495 | -2.550617 |
| C | -2.565062 | 1.306368  | -2.573807 |
| C | -0.639881 | -3.177068 | -1.880240 |
| C | 3.163854  | 5.122754  | -2.342532 |
| C | -3.586024 | -1.873697 | -2.111647 |
| H | 4.399500  | 0.564505  | -0.781507 |
| H | -3.568350 | 1.417080  | -2.177292 |
| C | -1.731416 | 2.432435  | -2.541933 |
| C | 0.823900  | 3.104317  | -2.489030 |
| C | 3.066834  | 1.932909  | -1.734570 |
| C | 3.596963  | -4.859527 | -1.739273 |
| C | 0.806672  | 4.391353  | -2.085784 |
| C | 3.990202  | -2.529984 | -1.060312 |
| H | -2.137114 | 3.344756  | -2.115926 |
| C | 2.973785  | -1.904978 | -1.692639 |
| C | 0.737663  | -3.338296 | -1.677811 |
| H | -1.302619 | -3.857543 | -1.353591 |
| C | 3.594367  | 0.656168  | -1.504854 |
| C | 4.220224  | -3.931618 | -0.910638 |
| H | 4.793876  | -1.889219 | -0.696752 |
| C | 5.192798  | -4.387424 | -0.026074 |
| H | 3.464849  | -6.886523 | -2.365940 |
| H | 2.882656  | -4.514911 | -2.476182 |
| C | 5.521927  | -5.719240 | 0.031858  |
| H | 5.709471  | -3.671317 | 0.604348  |
| C | 4.898634  | -6.620728 | -0.802557 |
| H | 6.288384  | -6.056361 | 0.718094  |
| C | 3.936578  | -6.185075 | -1.689130 |
| H | 5.179212  | -7.666435 | -0.777045 |
| C | 1.888072  | 5.283385  | -1.810789 |
| H | -0.180619 | 4.842261  | -1.988017 |
| C | 1.621791  | 6.429405  | -1.068059 |
| H | 5.096792  | 5.973807  | -2.606605 |
| H | 3.380653  | 4.257322  | -2.956734 |
| C | 2.582754  | 7.387557  | -0.866188 |
| H | 0.625034  | 6.569215  | -0.663018 |
| C | 3.831751  | 7.226212  | -1.426396 |
| H | 2.355709  | 8.271260  | -0.283578 |
| C | 4.118136  | 6.092557  | -2.157594 |
| H | 4.588189  | 7.990321  | -1.294233 |
| C | -4.900853 | -1.319099 | -2.115729 |
| H | -3.519450 | -2.887169 | -1.716093 |



|    |           |           |           |
|----|-----------|-----------|-----------|
| C  | -5.284167 | -0.280649 | -2.959805 |
| H  | -7.902849 | -1.897792 | -0.654007 |
| H  | -5.588573 | -2.733973 | -0.666855 |
| C  | -6.579352 | 0.171745  | -2.964990 |
| H  | -4.562956 | 0.134185  | -3.652662 |
| C  | -7.521287 | -0.401988 | -2.133516 |
| H  | -6.868156 | 0.964661  | -3.643759 |
| C  | -7.164934 | -1.440858 | -1.300241 |
| H  | -8.543749 | -0.045682 | -2.148816 |
| C  | -5.870940 | -1.898441 | -1.300078 |
| Cs | -0.170904 | 0.175166  | -0.050340 |
| C  | 0.723162  | 2.341199  | 2.648715  |
| C  | 0.026346  | 1.271456  | 3.202088  |
| C  | -1.334596 | 1.152819  | 3.109863  |
| C  | -2.116629 | 2.079851  | 2.431626  |
| C  | -1.936719 | -0.119733 | 3.030285  |
| C  | -3.136830 | -0.044915 | 2.329430  |
| C  | -1.151402 | -1.239288 | 3.036548  |
| C  | -1.480475 | -2.374272 | 2.311160  |
| C  | 0.249977  | -1.128802 | 3.142556  |
| C  | 0.861533  | -2.216736 | 2.523753  |
| C  | 0.829290  | 0.111593  | 3.201797  |
| C  | 2.053972  | 0.391568  | 2.605583  |
| H  | 0.400301  | 4.221104  | 1.641312  |
| H  | 2.699635  | -2.766368 | 1.532777  |
| C  | -3.372832 | 1.392138  | 2.072090  |
| C  | -3.547949 | -1.227278 | 1.709714  |
| C  | -1.457733 | 3.223999  | 1.993400  |
| C  | 1.949754  | -5.283278 | 2.499738  |
| C  | -4.444774 | 2.004913  | 1.533331  |
| H  | 3.688703  | -0.580872 | 1.582849  |
| H  | -4.451598 | -1.245669 | 1.106622  |
| C  | -2.730427 | -2.364764 | 1.697443  |
| C  | -0.231887 | -3.142063 | 2.136695  |
| C  | 2.158533  | -1.985809 | 2.061799  |
| C  | 2.782242  | 4.823454  | 2.718845  |
| C  | -0.217045 | -4.411675 | 1.681881  |
| C  | 3.184852  | 2.508862  | 1.939681  |
| H  | -3.046125 | -3.202123 | 1.081344  |
| C  | 2.095287  | 1.851352  | 2.386105  |
| C  | -0.065645 | 3.358363  | 2.106693  |
| H  | -1.991481 | 3.991362  | 1.442189  |
| C  | 2.739564  | -0.707720 | 2.095867  |
| C  | 3.440174  | 3.912486  | 1.896067  |
| H  | 4.023715  | 1.883527  | 1.632475  |
| C  | 4.485400  | 4.375309  | 1.101836  |
| H  | 2.676091  | 6.829702  | 3.418571  |
| H  | 2.003014  | 4.471370  | 3.384092  |
| C  | 4.863850  | 5.693691  | 1.121948  |
| H  | 5.024508  | 3.665872  | 0.480974  |
| C  | 4.210558  | 6.577956  | 1.951294  |
| H  | 5.685757  | 6.030685  | 0.504040  |
| C  | 3.170401  | 6.139571  | 2.746598  |
| H  | 4.524522  | 7.613281  | 1.995734  |
| C  | 0.842240  | -5.366282 | 1.661808  |
| H  | -1.174518 | -4.792484 | 1.325083  |
| C  | 0.717352  | -6.482200 | 0.838989  |
| H  | 3.744930  | -6.208713 | 3.175415  |
| H  | 2.036424  | -4.444945 | 3.180678  |
| C  | 1.680012  | -7.460253 | 0.826943  |

|   |           |           |           |
|---|-----------|-----------|-----------|
| H | -0.156908 | -6.571086 | 0.201997  |
| C | 2.769953  | -7.365349 | 1.664581  |
| H | 1.572415  | -8.315423 | 0.171182  |
| C | 2.899060  | -6.276091 | 2.503075  |
| H | 3.519751  | -8.146458 | 1.668728  |
| C | -5.757774 | 1.482375  | 1.314799  |
| H | -4.320248 | 3.056260  | 1.274637  |
| C | -6.285774 | 0.427142  | 2.056227  |
| H | -8.516650 | 2.229904  | -0.491392 |
| H | -6.202823 | 2.969672  | -0.153919 |
| C | -7.589173 | 0.029069  | 1.884549  |
| H | -5.668405 | -0.050565 | 2.807403  |
| C | -8.395489 | 0.669573  | 0.965260  |
| H | -7.988585 | -0.775111 | 2.489725  |
| C | -7.886829 | 1.714644  | 0.223113  |
| H | -9.426649 | 0.363628  | 0.837376  |
| C | -6.589697 | 2.125632  | 0.407186  |

---

**Table S12.** Atomic coordinates for optimised structure of two molecules of 2 (PSPW/Vosko)

|   | x         | y         | z         |
|---|-----------|-----------|-----------|
| C | 2.047100  | -2.007846 | -2.240498 |
| C | 1.331362  | -1.100103 | -3.016997 |
| C | -0.019922 | -1.197062 | -3.216525 |
| C | -0.782745 | -2.190584 | -2.616992 |
| C | -0.799963 | -0.032270 | -3.385136 |
| C | -2.093215 | -0.249639 | -2.913787 |
| C | -0.196861 | 1.199753  | -3.343037 |
| C | -0.824159 | 2.318753  | -2.807672 |
| C | 1.196691  | 1.309517  | -3.136891 |
| C | 1.499210  | 2.502397  | -2.485941 |
| C | 1.936824  | 0.173129  | -2.959996 |
| C | 3.029242  | 0.125081  | -2.103275 |
| H | 1.787192  | -3.851789 | -1.142232 |
| H | 2.944667  | 3.378085  | -1.148110 |
| C | -2.167710 | -1.682835 | -2.550285 |
| C | -2.776735 | 0.896393  | -2.500490 |
| C | -0.071098 | -3.186445 | -1.954123 |
| C | 2.183755  | 5.667916  | -2.245794 |
| C | -3.206074 | -2.425027 | -2.109845 |
| H | 4.240254  | 1.367562  | -0.824873 |
| H | -3.776248 | 0.816613  | -2.087361 |
| C | -2.156632 | 2.152148  | -2.449885 |
| C | 0.238609  | 3.268128  | -2.414174 |
| C | 2.667832  | 2.498393  | -1.722406 |
| C | 4.399592  | -4.088069 | -1.916758 |
| C | -0.000270 | 4.521359  | -1.976323 |
| C | 4.383844  | -1.742693 | -1.180986 |
| H | -2.710512 | 2.966874  | -1.993991 |
| C | 3.260900  | -1.294295 | -1.782243 |
| C | 1.316608  | -3.103863 | -1.775093 |
| H | -0.592207 | -3.986759 | -1.436851 |
| C | 3.418540  | 1.331262  | -1.534337 |
| C | 4.862638  | -3.083889 | -1.072177 |
| H | 5.067017  | -0.977595 | -0.811462 |
| C | 5.916927  | -3.379730 | -0.213651 |
| H | 4.619292  | -6.090467 | -2.595736 |
| H | 3.621914  | -3.859010 | -2.634239 |
| C | 6.479101  | -4.632353 | -0.196034 |
| H | 6.309211  | -2.598173 | 0.428590  |
| C | 6.011210  | -5.610411 | -1.045683 |
| H | 7.305820  | -4.843512 | 0.470280  |
| C | 4.970823  | -5.332467 | -1.906902 |
| H | 6.474044  | -6.589503 | -1.052121 |
| C | 0.909741  | 5.585333  | -1.692404 |
| H | -1.050143 | 4.786220  | -1.852893 |
| C | 0.457193  | 6.647244  | -0.915578 |
| H | 3.928944  | 6.856575  | -2.513530 |
| H | 2.539984  | 4.870084  | -2.885936 |
| C | 1.235591  | 7.756498  | -0.701316 |
| H | -0.540924 | 6.597048  | -0.493236 |
| C | 2.482859  | 7.834278  | -1.282808 |
| H | 0.865447  | 8.571230  | -0.092120 |
| C | 2.953195  | 6.787843  | -2.048052 |
| H | 3.093337  | 8.717808  | -1.140614 |
| C | -4.598532 | -2.114230 | -2.080923 |
| H | -2.952737 | -3.419497 | -1.742596 |
| C | -5.176165 | -1.141014 | -2.891455 |

|   |           |           |           |
|---|-----------|-----------|-----------|
| H | -7.422046 | -3.254606 | -0.594043 |
| H | -4.996443 | -3.663477 | -0.661217 |
| C | -6.531106 | -0.927213 | -2.866649 |
| H | -4.553246 | -0.587568 | -3.582797 |
| C | -7.340324 | -1.679697 | -2.037979 |
| H | -6.968976 | -0.182593 | -3.519844 |
| C | -6.789339 | -2.657882 | -1.237882 |
| H | -8.410017 | -1.511462 | -2.029620 |
| C | -5.434737 | -2.876880 | -1.267831 |
| C | 0.369731  | 2.376426  | 2.702133  |
| C | -0.115054 | 1.186490  | 3.236136  |
| C | -1.434537 | 0.828949  | 3.159518  |
| C | -2.381546 | 1.617389  | 2.517251  |
| C | -1.801636 | -0.528402 | 3.054109  |
| C | -3.008526 | -0.652351 | 2.372116  |
| C | -0.829420 | -1.489529 | 3.019495  |
| C | -0.964245 | -2.647327 | 2.268501  |
| C | 0.531552  | -1.133114 | 3.109113  |
| C | 1.315715  | -2.079195 | 2.452960  |
| C | 0.881566  | 0.189020  | 3.193646  |
| C | 2.025615  | 0.697416  | 2.588347  |
| H | -0.301356 | 4.192033  | 1.750104  |
| H | 3.203842  | -2.267817 | 1.422357  |
| C | -3.501489 | 0.725196  | 2.156723  |
| C | -3.213689 | -1.873937 | 1.726604  |
| C | -1.945213 | 2.870981  | 2.100862  |
| C | 2.932298  | -4.900617 | 2.331640  |
| C | -4.675164 | 1.149406  | 1.649428  |
| H | 3.788416  | 0.057347  | 1.517451  |
| H | -4.110510 | -2.038965 | 1.135743  |
| C | -2.206934 | -2.846505 | 1.672539  |
| C | 0.397755  | -3.175381 | 2.056302  |
| C | 2.542115  | -1.609345 | 1.979547  |
| C | 1.954501  | 5.184108  | 2.810501  |
| C | 0.630235  | -4.410664 | 1.567407  |
| C | 2.748724  | 2.997973  | 1.964008  |
| H | -2.379627 | -3.711780 | 1.038591  |
| C | 1.802128  | 2.145941  | 2.407588  |
| C | -0.597503 | 3.249050  | 2.198532  |
| H | -2.617171 | 3.543665  | 1.577856  |
| C | 2.886641  | -0.249225 | 2.039906  |
| C | 2.749016  | 4.425265  | 1.954578  |
| H | 3.679808  | 2.540049  | 1.628597  |
| C | 3.680299  | 5.086210  | 1.158733  |
| H | 1.505427  | 7.121795  | 3.565230  |
| H | 1.262816  | 4.682685  | 3.476728  |
| C | 3.818085  | 6.450119  | 1.209015  |
| H | 4.325707  | 4.499541  | 0.511681  |
| C | 3.033014  | 7.183367  | 2.070722  |
| H | 4.555316  | 6.943187  | 0.589111  |
| C | 2.102383  | 6.547340  | 2.868226  |
| H | 3.158239  | 8.256753  | 2.138611  |
| C | 1.842113  | -5.159983 | 1.507122  |
| H | -0.250445 | -4.947691 | 1.213739  |
| C | 1.902987  | -6.260227 | 0.656441  |
| H | 4.875732  | -5.506484 | 2.957433  |
| H | 2.880683  | -4.076841 | 3.033582  |
| C | 3.024128  | -7.050057 | 0.604881  |
| H | 1.047018  | -6.488535 | 0.029397  |
| C | 4.094898  | -6.782117 | 1.429669  |

|   |           |           |           |
|---|-----------|-----------|-----------|
| H | 3.058616  | -7.894735 | -0.072057 |
| C | 4.043213  | -5.707719 | 2.295244  |
| H | 4.971824  | -7.416631 | 1.402515  |
| C | -5.877830 | 0.406163  | 1.435057  |
| H | -4.744729 | 2.211980  | 1.417360  |
| C | -6.195665 | -0.743857 | 2.155093  |
| H | -8.758418 | 0.692008  | -0.312235 |
| H | -6.607636 | 1.824817  | 0.013067  |
| C | -7.410203 | -1.364080 | 1.990764  |
| H | -5.489381 | -1.121482 | 2.884597  |
| C | -8.334470 | -0.856040 | 1.100197  |
| H | -7.648762 | -2.240927 | 2.579578  |
| C | -8.033865 | 0.280547  | 0.379435  |
| H | -9.296784 | -1.338072 | 0.978364  |
| C | -6.827566 | 0.912058  | 0.556587  |

---

**Table S13.** Atomic coordinates for optimised structure of compound 8 (PSPW/Vosko)

|   | x         | y         | z         |
|---|-----------|-----------|-----------|
| C | -1.327471 | -0.395501 | 0.960029  |
| C | -0.260119 | 0.522554  | 1.107964  |
| C | 0.404144  | -3.196433 | -0.287335 |
| C | 1.331120  | -1.263743 | 0.808408  |
| C | -1.047341 | -1.707768 | 0.676397  |
| C | 1.043702  | 0.095387  | 1.027131  |
| C | -0.661412 | 1.753603  | 0.623500  |
| C | -2.438680 | 0.236088  | 0.429869  |
| C | 0.291927  | -2.143519 | 0.600889  |
| C | -1.846541 | -2.464172 | -0.165652 |
| C | 2.058259  | 0.887729  | 0.494519  |
| C | 2.548210  | -1.396205 | 0.157767  |
| H | -4.171685 | -0.080554 | -0.781558 |
| H | -1.074073 | -3.658333 | -1.790877 |
| C | -2.137599 | 1.705810  | 0.367577  |
| C | 0.346054  | 2.556019  | 0.123197  |
| C | -3.323950 | -0.543753 | -0.286533 |
| H | -2.362847 | 2.148092  | -0.606891 |
| H | -2.685230 | 2.333696  | 1.081918  |
| H | 1.781698  | -4.198329 | -1.578007 |
| H | -3.671226 | -2.391307 | -1.296477 |
| C | 1.701952  | 2.141411  | 0.070566  |
| C | 3.205269  | -0.031519 | 0.140572  |
| C | 2.720734  | -2.528711 | -0.613139 |
| H | 3.633706  | 0.203186  | -0.837114 |
| H | 4.033307  | 0.039292  | 0.860148  |
| H | 2.383792  | 2.787876  | -0.468422 |
| H | 3.631482  | -2.676069 | -1.183584 |
| C | -3.025405 | -1.882067 | -0.590370 |
| C | -0.996500 | -3.584261 | -0.702507 |
| C | 1.654014  | -3.414412 | -0.841341 |
| H | -1.292907 | -4.577572 | -0.343923 |
| N | -0.024860 | 3.668795  | -0.673457 |
| O | 0.889085  | 4.274074  | -1.294558 |
| O | -1.247751 | 4.004507  | -0.818392 |

**Table S14.** Atomic coordinates for optimised structure of complex compound 8 and caesium ion (PSPW/Vosko)

|    | x         | y         | z         |
|----|-----------|-----------|-----------|
| C  | -1.353938 | -0.198495 | 0.974366  |
| C  | -0.287294 | 0.720329  | 1.107386  |
| C  | 0.370076  | -3.021521 | -0.210841 |
| C  | 1.304550  | -1.072219 | 0.848465  |
| C  | -1.074406 | -1.525621 | 0.761235  |
| C  | 1.019464  | 0.286526  | 1.071387  |
| C  | -0.671979 | 1.950517  | 0.604062  |
| C  | -2.460597 | 0.415801  | 0.409944  |
| C  | 0.268567  | -1.956305 | 0.666560  |
| C  | -1.889302 | -2.326247 | -0.022241 |
| C  | 2.055419  | 1.074427  | 0.583788  |
| C  | 2.519043  | -1.198793 | 0.185339  |
| H  | -4.241263 | 0.008275  | -0.725370 |
| H  | -1.206950 | -3.726756 | -1.561498 |
| C  | -2.146141 | 1.887625  | 0.293873  |
| C  | 0.376719  | 2.768203  | 0.206193  |
| C  | -3.366939 | -0.408268 | -0.235194 |
| H  | -2.355491 | 2.295610  | -0.700424 |
| H  | -2.731414 | 2.525726  | 0.969156  |
| H  | 1.724806  | -3.989756 | -1.556384 |
| H  | -3.761054 | -2.339920 | -1.074635 |
| C  | 1.725444  | 2.348093  | 0.203640  |
| C  | 3.194850  | 0.155394  | 0.217723  |
| C  | 2.668278  | -2.311903 | -0.616965 |
| H  | 3.655112  | 0.422962  | -0.737081 |
| H  | 4.001969  | 0.186541  | 0.962908  |
| H  | 2.432142  | 3.026502  | -0.259477 |
| H  | 3.566689  | -2.453842 | -1.208422 |
| C  | -3.084176 | -1.770125 | -0.446198 |
| C  | -1.044093 | -3.477136 | -0.509465 |
| C  | 1.601539  | -3.206163 | -0.821181 |
| H  | -1.279809 | -4.411623 | 0.014676  |
| N  | 0.102642  | 3.965297  | -0.507193 |
| O  | 1.077776  | 4.681794  | -0.858967 |
| O  | -1.089965 | 4.227515  | -0.841733 |
| Cs | -0.062699 | -0.304541 | -2.357560 |

**Table S15.** Atomic coordinates for optimised structure of compound 9 (PSPW/Vosko)

|   | x         | y         | z         |
|---|-----------|-----------|-----------|
| C | 0.203774  | -0.233281 | 1.108546  |
| C | 1.296962  | -1.088259 | 0.868232  |
| C | -2.485303 | -2.165046 | -0.078092 |
| C | -0.232755 | -2.887246 | 0.390016  |
| C | -1.076892 | -0.709634 | 0.995058  |
| C | 1.082178  | -2.397278 | 0.520241  |
| C | 2.382664  | -0.373761 | 0.401278  |
| C | 0.547793  | 1.072478  | 0.806333  |
| C | -1.297522 | -2.053651 | 0.622497  |
| C | -2.116995 | 0.090435  | 0.557349  |
| C | 1.941792  | -3.084520 | -0.315831 |
| C | -0.276187 | -3.891407 | -0.560132 |
| H | -2.587046 | 2.121936  | 0.009833  |
| H | -3.567927 | -0.496626 | -0.949475 |
| C | 2.027784  | 1.094798  | 0.503386  |
| C | 3.328787  | -1.085674 | -0.313784 |
| C | -0.516235 | 1.898882  | 0.512901  |
| H | 2.221809  | 1.634528  | -0.429336 |
| H | 2.601067  | 1.620299  | 1.277438  |
| H | -3.467565 | -3.367134 | -1.561824 |
| H | 3.816785  | -2.893502 | -1.347084 |
| C | 3.110072  | -2.430767 | -0.666675 |
| C | 1.156944  | -4.238741 | -0.906836 |
| C | -1.493862 | -4.093229 | -1.181845 |
| H | 1.306870  | -4.324801 | -1.986113 |
| H | 1.457136  | -5.204241 | -0.479502 |
| H | -1.597160 | -4.831698 | -1.969695 |
| H | 4.191025  | -0.587222 | -0.742098 |
| C | -1.838220 | 1.434289  | 0.384835  |
| C | -3.195099 | -0.831261 | 0.021487  |
| C | -2.586297 | -3.238447 | -0.942523 |
| H | -4.067979 | -0.877360 | 0.685364  |
| I | -0.116688 | 3.892442  | -0.045227 |



**Table S15.** Atomic coordinates for optimised structure of complex of compound 9 and caesium ion (PSPW/Vosko)

|    | x         | y         | z         |
|----|-----------|-----------|-----------|
| C  | 0.168205  | 0.022373  | 1.388844  |
| C  | 1.265011  | -0.846608 | 1.186286  |
| C  | -2.517784 | -1.926095 | 0.191114  |
| C  | -0.273852 | -2.641983 | 0.714995  |
| C  | -1.114084 | -0.444026 | 1.247252  |
| C  | 1.045317  | -2.159077 | 0.852682  |
| C  | 2.353523  | -0.142256 | 0.697867  |
| C  | 0.524841  | 1.315815  | 1.035291  |
| C  | -1.337250 | -1.795824 | 0.905164  |
| C  | -2.137790 | 0.346204  | 0.741265  |
| C  | 1.900021  | -2.867591 | 0.022567  |
| C  | -0.313761 | -3.678924 | -0.201952 |
| H  | -2.569789 | 2.339230  | 0.047011  |
| H  | -3.675513 | -0.289693 | -0.687351 |
| C  | 2.017790  | 1.329590  | 0.811222  |
| C  | 3.280368  | -0.863782 | -0.031376 |
| C  | -0.511530 | 2.132374  | 0.629871  |
| H  | 2.290045  | 1.913791  | -0.074369 |
| H  | 2.544741  | 1.811339  | 1.645347  |
| H  | -3.505341 | -3.194881 | -1.235580 |
| H  | 3.762614  | -2.694972 | -1.035009 |
| C  | 3.054870  | -2.215044 | -0.368218 |
| C  | 1.121073  | -4.058583 | -0.499138 |
| C  | -1.525087 | -3.901036 | -0.829697 |
| H  | 1.302605  | -4.268376 | -1.555977 |
| H  | 1.403536  | -4.976711 | 0.033897  |
| H  | -1.632839 | -4.687955 | -1.567976 |
| H  | 4.145873  | -0.374339 | -0.463334 |
| C  | -1.836607 | 1.669141  | 0.481397  |
| C  | -3.230055 | -0.592950 | 0.263125  |
| C  | -2.617461 | -3.030441 | -0.634728 |
| H  | -4.062982 | -0.625901 | 0.978876  |
| I  | -0.060038 | 4.052850  | -0.097586 |
| Cs | 0.038581  | -0.522354 | -2.047541 |

**Table S16.** Atomic coordinates for optimised structure of 2:1 complex of compound 9 and caesium ion (PSPW/Vosko).

|    | x         | y         | z         |
|----|-----------|-----------|-----------|
| C  | 2.757014  | -2.108093 | -0.764471 |
| C  | 3.154478  | -1.609708 | 0.496393  |
| C  | 2.177661  | 0.867340  | -2.547619 |
| C  | 3.348473  | 0.601175  | -0.451816 |
| C  | 2.661811  | -1.258999 | -1.837949 |
| C  | 3.450967  | -0.276380 | 0.650471  |
| C  | 2.582087  | -2.356788 | 1.512753  |
| C  | 1.919777  | -3.200810 | -0.599878 |
| C  | 2.951510  | 0.115709  | -1.676418 |
| C  | 1.701708  | -1.437769 | -2.821059 |
| C  | 3.206827  | 0.400353  | 1.835829  |
| C  | 3.013063  | 1.874459  | -0.016165 |
| H  | 0.164754  | -2.798404 | -3.481369 |
| H  | 0.474847  | 0.134558  | -3.717929 |
| C  | 1.931235  | -3.567133 | 0.867024  |
| C  | 2.464911  | -1.732161 | 2.743178  |
| C  | 1.070435  | -3.459823 | -1.656278 |
| H  | 0.919078  | -3.764163 | 1.238953  |
| H  | 2.493138  | -4.491249 | 1.057354  |
| H  | 1.297794  | 2.818840  | -2.778743 |
| H  | 2.543190  | 0.093638  | 3.858301  |
| C  | 2.773270  | -0.367350 | 2.903510  |
| C  | 3.156653  | 1.879401  | 1.494588  |
| C  | 2.347261  | 2.678058  | -0.923052 |
| H  | 2.334676  | 2.399846  | 1.996634  |
| H  | 4.072534  | 2.396796  | 1.808189  |
| H  | 2.004746  | 3.671836  | -0.650370 |
| H  | 2.016622  | -2.248205 | 3.585874  |
| C  | 0.942726  | -2.590177 | -2.755923 |
| C  | 1.522215  | -0.102127 | -3.515001 |
| C  | 1.928103  | 2.175000  | -2.172474 |
| H  | 2.025674  | -0.092336 | -4.490823 |
| I  | -0.247072 | -5.093809 | -1.519773 |
| Cs | 0.041707  | -0.008855 | 0.149282  |
| C  | -2.534031 | 0.138400  | 2.449077  |
| C  | -3.074757 | -0.628624 | 1.390056  |
| C  | -1.854503 | 3.203521  | 0.850080  |
| C  | -3.193341 | 1.362682  | 0.034213  |
| C  | -2.331430 | 1.486046  | 2.288907  |
| C  | -3.391527 | -0.025399 | 0.196208  |
| C  | -2.591997 | -1.926505 | 1.447083  |
| C  | -1.685541 | -0.642117 | 3.218749  |
| C  | -2.674274 | 2.107001  | 1.064902  |
| C  | -1.269813 | 2.147875  | 2.886266  |
| C  | -3.245478 | -0.672817 | -1.022753 |
| C  | -2.919110 | 1.658594  | -1.291093 |
| H  | 0.028862  | -0.527938 | 4.509650  |
| H  | -4.110054 | 0.461977  | -2.664214 |
| C  | -1.873498 | -2.079531 | 2.771637  |
| C  | -2.561208 | -2.626516 | 0.254469  |
| C  | -0.693170 | 0.023124  | 3.916808  |
| H  | -0.924310 | -2.617918 | 2.680799  |
| H  | -2.471162 | -2.650814 | 3.493657  |
| H  | -2.709950 | -2.582119 | -1.874204 |
| H  | 0.379216  | 1.853125  | 4.232881  |
| C  | -1.700750 | 3.581105  | -0.467525 |

|   |           |           |           |
|---|-----------|-----------|-----------|
| C | -1.054082 | 3.430236  | 2.109682  |
| C | -0.487487 | 1.408471  | 3.755001  |
| H | -0.000744 | 3.628393  | 1.879901  |
| H | -1.400875 | 4.315282  | 2.658884  |
| H | -2.152826 | -3.632286 | 0.207746  |
| I | -0.478079 | 5.227881  | -0.931917 |
| C | -3.174330 | 0.398426  | -2.094304 |
| C | -2.207771 | 2.816788  | -1.536093 |
| C | -2.885135 | -2.007389 | -0.969424 |
| H | -2.391793 | 0.202328  | -2.833313 |
| H | -1.931752 | 3.103399  | -2.544812 |

---
